# Supplementary material for: An integrated prognosis prediction model based on real-word clinical characteristics for immunotherapy in advanced esophageal squamous cell carcinoma
Source: Research Square preprint supplement (doi:10.21203/rs.3.rs-5322833/v1), 2024-11-06
Supplement: Supplementary file 1 [file 74522530d5bd315d6960f322.xlsx]

## Sheet: original data（430）
id	age	sex	smoke	alcohol	Staging	Liver_metastasis	Lung_metastasis	Bone_metastasis	Metastasis_no	Treatment_3	Treatment	Line_of_therapy	Progress	PFS	Death	OS	Resistance	irAE	LDH_	LDH	CEA_	CEA	CA199_	CA199	NSE_	NSE	Hb_	Hb	WBC_	WBC	AEC_	AEC	ANC_	ANC	ALC_	ALC	PLT_	PLT	NLR_	NLR	dNLR_	dNLR	PLR_	PLR	LMR_	LMR	PNI_	PNI	SII_
T001997815	66	0	1	0	4	0	0	0	1	3	2	1	1	14.5	1	16.4	2	1	163	2	4.59	2	14.07	2	13.1	2	128	2	5.93	2	0.08	2	3.74	2	1.79	1	277	2	2.09	2	1.71	2	154.75	2	5.97	1	51.55	1	578.76
T001943395	55	0	1	1	4	0	0	0	1	4	1	2	1	2.3	1	6.8	1	1	411	1	1.36	2	8.27	2	7.49	2	99	1	4.39	2	0.12	1	1.69	2	1.77	1	220	2	0.95	2	0.63	2	124.29	2	2.33	2	50.15	1	210.06
T001559851	58	0	1	1	4	0	1	0	1	1	1	2	1	1.9	1	4	1	0	217	2	3.84	2	33.89	2	12.14	2	127	2	7.11	2	0.06	2	5.81	2	0.75	2	224	2	7.75	1	4.47	1	298.67	1	1.56	2	47.25	2	1735.25
T001504421	62	0	1	1	4	0	0	0	1	1	1	2	1	14.8	1	16	2	1	158	2	2.49	2	11.01	2	11.47	2	137	2	6.71	2	0.03	2	4.8	2	1.09	2	274	2	4.4	1	2.51	1	251.38	1	1.43	2	52.15	1	1206.61
T001481367	62	0	1	1	4	0	1	0	1	1	1	2	1	1.7	1	4.2	1	0	230	2	5.66	1	5.49	2	38.74	1	100	1	5.18	2	0.18	1	3.94	2	0.51	2	262	2	7.73	1	3.18	1	513.73	1	0.96	2	41.95	2	2024.08
T001535851	59	0	1	1	4	0	1	0	1	1	1	2	1	22	1	22	2	1	232	2	3.4	2	20.35	2	48.43	1	132	2	4.85	2	0.06	2	3.54	2	0.94	2	188	2	3.77	1	2.7	1	200	1	3.13	2	52.6	1	708
T001424207	56	0	0	0	4	0	1	0	1	1	1	2	1	15.1	1	23.2	2	1	193	2	2.35	2	2.69	2	19	1	141	2	4.43	2	0.02	2	3.7	2	0.49	2	243	2	7.55	1	5.07	1	495.92	1	2.33	2	51.25	1	1834.9
T001548022	47	1	0	0	4	0	1	0	1	1	1	1	1	2.7	1	21.3	1	0	141	2	1.96	2	16.83	2	10.41	2	112	1	6.86	2	0.04	2	5	2	1.53	2	223	2	3.27	1	2.69	1	145.75	2	5.67	1	47.95	2	728.76
T001402329	55	0	0	0	4	0	1	0	1	1	1	2	1	1.5	1	15.4	1	0	297	1	2.29	2	8.95	2	16.59	1	113	1	4.89	2	0.01	2	3.86	2	0.58	2	254	2	6.66	1	3.75	1	437.93	1	1.35	2	47.5	2	1690.41
T001486884	58	0	0	0	4	1	1	0	1	1	1	1	1	1.2	1	3.8	1	0	201	2	6.31	1	0.972	2	17.21	1	114	1	8.3	2	0.15	1	6.24	2	1.17	2	285	2	5.33	1	3.03	1	243.59	1	1.67	2	48.75	2	1520
T001482402	49	0	1	1	4	1	0	0	1	1	1	2	1	1.4	1	12.7	1	0	226	2	3.39	2	21.4	2	20.12	1	142	2	4.87	2	0.03	2	2.79	2	1.74	1	194	2	1.6	2	1.34	2	111.49	2	6	1	52.4	1	311.07
T001519657	68	1	0	0	4	0	1	0	1	1	1	2	1	8.1	1	8.6	2	1	194	2	2.92	2	12.06	2	14.29	2	129	2	4.41	2	0.01	2	3.84	2	0.33	2	217	2	11.64	1	6.74	1	657.58	1	1.57	2	46.05	2	2525.09
T001249500	63	0	1	1	4	1	0	1	1	1	1	2	1	1.5	1	6.6	1	1	144	2	3.2	2	7.83	2	25.12	1	146	2	4.76	2	0.01	2	4.06	2	0.47	2	212	2	8.64	1	5.8	1	451.06	1	2.24	2	48.85	2	1831.32
T001507917	53	0	1	1	4	0	1	0	1	1	1	1	1	10.5	1	15.7	2	1	164	2	2.51	2	8.01	2	18.69	1	113	1	5.38	2	0.17	1	3.43	2	1.37	2	359	1	2.5	2	1.76	2	262.04	1	3.61	2	50.55	1	898.81
T001537628	57	0	1	1	4	0	0	0	1	1	1	2	1	4.6	1	14.6	2	0	183	2	2.77	2	43.63	1	10.74	2	110	1	5.16	2	0.21	1	3.91	2	0.57	2	155	2	6.86	1	3.13	1	271.93	1	1.27	2	50.35	1	1063.25
T001597184	55	0	1	1	4	0	1	0	1	1	1	2	1	0.9	1	10.9	1	0	207	2	4.68	2	19.73	2	13.71	2	114	1	3.97	2	0.19	1	1.93	2	1.57	2	149	2	1.23	2	0.95	2	94.9	2	6.28	1	52.65	1	183.17
T001287402	58	0	1	1	4	1	1	0	1	1	1	2	1	0.9	1	2.1	1	0	647	1	1.65	2	3.21	2	8.68	2	127	2	9.92	2	0.03	2	7.02	2	2.07	1	294	2	3.39	1	2.42	1	142.03	2	2.76	2	53.75	1	997.04
T001425900	59	0	1	1	4	1	0	0	1	1	1	2	1	6	1	14.3	2	1	266	1	1.91	2	7.1	2	17.42	1	135	2	6.26	2	0.21	1	3.44	2	2.09	1	254	2	1.65	2	1.22	2	121.53	2	4.35	1	52.95	1	418.07
T001504173	47	0	1	1	4	0	0	0	1	3	2	2	1	1.2	1	23.8	1	0	174	2	0.633	2	9.8	2	16.7	1	104	1	6.91	2	0.17	1	5.74	2	0.75	2	342	1	7.65	1	4.91	1	456	1	3.41	2	49.45	2	2617.44
T001508895	67	0	1	1	4	1	0	0	1	1	1	2	1	1.4	1	6.1	1	0	257	1	35.52	1	8.92	2	20.39	1	132	2	7.28	2	0.12	1	5.32	2	1.29	2	246	2	4.12	1	2.71	1	190.7	1	2.43	2	51.45	1	1014.51
T001317685	54	0	0	0	4	1	0	1	1	1	1	2	1	2.2	1	8.6	1	0	237	2	5.94	1	28.05	2	14.57	2	139	2	5.42	2	0.17	1	3.74	2	0.9	2	243	2	4.16	1	2.23	1	270	1	1.5	2	51.1	1	1009.8
T001445607	51	0	1	1	4	0	0	0	1	1	1	2	1	1.8	1	6.2	1	0	157	2	2.32	2	12.95	2	9.38	2	117	1	8.16	2	0.12	1	6.89	2	0.57	2	211	2	12.09	1	5.43	1	370.18	1	1.06	2	44.75	2	2550.51
T001445513	49	0	1	1	4	0	0	0	1	1	1	2	1	5.6	1	7.6	1	1	139	2	1.83	2	25.79	2	15.25	1	90	1	3.98	2	0.04	2	3.37	2	0.35	2	262	2	9.63	1	5.52	1	748.57	1	1.75	2	37.55	2	2522.69
T001268046	60	1	0	0	4	0	0	0	1	1	1	1	1	5.5	1	12	1	0	119	2	1.17	2	4.63	2	11.83	2	108	1	2.93	2	0	2	2.09	2	0.64	2	152	2	3.27	1	2.49	1	237.5	1	3.37	2	45.2	2	496.38
T001436244	54	0	1	0	4	0	1	0	1	1	1	2	1	2	1	3.7	1	0	225	2	1.72	2	10.87	2	13.95	2	140	2	6.52	2	0.04	2	5.5	2	0.65	2	225	2	8.46	1	5.39	1	346.15	1	2.1	2	45.15	2	1903.85
T001483104	69	1	0	0	4	1	1	1	1	1	1	1	1	1.9	1	12.2	1	0	322	1	40.89	1	227.4	1	35.04	1	98	1	4.19	2	0.13	1	3.13	2	0.43	2	274	2	7.28	1	2.95	1	637.21	1	0.88	2	45.65	2	1994.47
T001328193	63	1	0	0	4	0	0	0	1	1	1	2	1	3.4	1	7.9	1	1	237	2	4.19	2	7.65	2	13.63	2	114	1	4.28	2	0.1	2	3.28	2	0.52	2	177	2	6.31	1	3.28	1	340.38	1	1.53	2	46.6	2	1116.46
T001419407	57	0	1	1	4	0	1	0	1	1	1	2	1	0.7	1	2.5	1	0	128	2	2.82	2	17.61	2	15.43	1	106	1	5.57	2	0.04	2	4.4	2	0.6	2	462	1	7.33	1	3.76	1	770	1	1.18	2	43.5	2	3388
T001348153	60	0	1	1	4	0	0	0	1	1	1	2	1	1	1	1.5	1	1	509	1	2.66	2	12.41	2	29.25	1	120	2	5.77	2	0.06	2	4.51	2	0.73	2	220	2	6.18	1	3.58	1	301.37	1	1.62	2	49.05	2	1359.18
T001507155	78	0	1	1	4	0	1	0	1	1	1	2	1	1	1	2.6	1	0	233	2	2.4	2	7.25	2	25.46	1	90	1	7.17	2	0.19	1	4.81	2	1.37	2	365	1	3.51	1	2.04	1	266.42	1	1.76	2	46.15	2	1281.5
T001348256	72	1	0	0	4	0	0	0	1	1	1	2	1	2.5	1	3.1	2	1	180	2	1.8	2	25.76	2	14.48	2	127	2	5.45	2	0.07	2	3.47	2	1.61	2	306	1	2.16	2	1.75	2	190.06	1	5.96	1	51.15	1	659.52
T001311639	65	0	0	0	4	0	1	0	1	1	1	1	1	1.9	1	3.9	1	1	235	2	3.73	2	38.46	1	11.23	2	137	2	8.82	2	0.23	1	6.93	2	1.1	2	192	2	6.3	1	3.67	1	174.55	2	2.04	2	48.7	2	1209.6
T001221138	59	0	1	1	4	0	1	0	1	1	1	2	1	1.4	1	30.2	1	0	129	2	1.72	2	13.02	2	15.41	1	131	2	3.23	2	0.13	1	1.78	2	0.92	2	173	2	1.93	2	1.23	2	188.04	2	2.36	2	48.6	2	334.72
T001371888	65	0	0	0	4	0	0	0	1	1	1	2	1	1.4	1	4.6	1	0	225	2	17.46	1	15.31	2	32.27	1	107	1	5.65	2	0.03	2	4.39	2	0.96	2	139	2	4.57	1	3.48	1	144.79	2	3.69	2	49.5	2	635.64
T001282979	41	0	1	1	4	0	0	1	1	1	1	1	1	1.3	1	1.3	1	0	172	2	5.15	1	13.78	2	14.02	2	124	2	4.99	2	0.04	2	3.92	2	0.57	2	223	2	6.88	1	3.66	1	391.23	1	1.27	2	47.85	2	1533.61
T001347354	55	0	0	1	4	0	1	0	1	1	1	2	1	2.1	1	11.1	1	0	171	2	1.25	2	5.44	2	10.09	2	121	2	2.74	2	0.14	1	1.61	2	0.79	2	109	2	2.04	2	1.42	2	137.97	2	4.39	1	49.15	2	222.14
T001398811	47	0	1	1	4	0	0	0	1	1	1	2	1	0.2	1	1.7	1	0	132	2	1.34	2	3.18	2	16.94	1	132	2	9.42	2	0.29	1	6.51	2	1.96	1	205	2	3.32	1	2.24	1	104.59	2	3.16	2	54.1	1	680.89
T001379435	49	0	1	1	4	0	0	0	1	1	1	2	1	1.2	1	3.8	1	0	168	2	1.11	2	7.79	2	34	1	118	1	4.05	2	0.03	2	3.24	2	0.48	2	126	2	6.75	1	4	1	262.5	1	1.71	2	46.4	2	850.5
T001353344	51	0	1	1	4	1	0	1	1	1	1	1	1	1.4	1	2.3	1	0	195	2	35.23	1	8.1	2	76.21	1	138	2	4.21	2	0.02	2	3.55	2	0.39	2	171	2	9.1	1	5.38	1	438.46	1	1.63	2	50.35	1	1556.54
T001428481	67	0	1	0	4	0	0	1	1	1	1	2	1	1.8	1	4.2	1	0	227	2	1.17	2	9.45	2	26.95	1	115	1	5.1	2	0.13	1	3.58	2	0.97	2	239	2	3.69	1	2.36	1	246.39	1	2.62	2	44.25	2	882.08
T001171476	67	0	1	1	4	0	0	0	1	1	1	2	1	7.9	1	13.6	2	0	182	2	2.54	2	16.51	2	13.05	2	129	2	5.78	2	0.04	2	4.31	2	1.09	2	316	1	3.95	1	2.93	1	289.91	1	3.41	2	48.55	2	1249.5
T001396255	48	1	0	0	4	1	0	0	1	1	1	2	1	1.8	1	19.6	1	0	248	1	1.48	2	17.71	2	278.7	1	119	1	3.02	2	0.1	2	1.83	2	0.78	2	186	2	2.35	2	1.54	2	238.46	1	2.69	2	40.7	2	436.38
T001423885	53	0	0	1	4	0	0	0	1	1	1	2	1	1.9	1	7.3	1	0	184	2	3.39	2	40.03	1	7.17	2	117	1	4.25	2	0.03	2	3.4	2	0.47	2	184	2	7.23	1	4	1	391.49	1	1.38	2	50.15	1	1331.06
T001475255	52	0	1	1	4	1	1	0	1	1	1	2	1	2.4	1	8.3	1	0	196	2	6.06	1	17.59	2	24.07	1	119	1	4.35	2	0.07	2	3.37	2	0.53	2	173	2	6.36	1	3.44	1	326.42	1	1.43	2	46.15	2	1100.02
T001372391	63	0	1	1	4	0	1	1	1	1	1	2	1	1.8	1	3.4	1	0	178	2	4.71	2	24.23	2	13.47	2	113	1	6.38	2	0.1	2	5.32	2	0.68	2	320	1	7.82	1	5.02	1	470.59	1	2.62	2	45.3	2	2503.53
T001480690	48	0	1	1	4	0	0	0	1	1	1	2	1	4.3	1	5.8	1	1	198	2	3.21	2	29.63	2	13.45	2	130	2	3.67	2	0.23	1	2.57	2	0.5	2	199	2	5.14	1	2.34	1	398	1	1.39	2	46.6	2	1022.86
T001450110	55	0	1	0	4	1	0	0	1	1	1	2	1	1.7	1	14.7	1	0	186	2	2.11	2	1.33	2	17.67	1	127	2	5.68	2	0.16	1	4.22	2	0.99	2	179	2	4.26	1	2.89	1	180.81	2	3.54	2	50.75	1	763.01
T001459391	53	0	1	1	4	0	1	1	1	1	1	2	1	3.1	1	10.2	1	1	224	2	2.07	2	25.93	2	14.94	2	116	1	3.91	2	0.1	2	2.49	2	1.03	2	204	2	2.42	2	1.75	2	198.06	1	3.81	2	47.15	2	493.17
T001088182	64	0	1	1	4	0	1	1	1	1	1	2	1	32.6	1	33.5	2	0	174	2	2.26	2	10.27	2	12.28	2	114	1	6.33	2	0.21	1	4.79	2	1	2	185	2	4.79	1	3.11	1	185	2	3.33	2	49.6	1	886.15
T001466484	58	0	1	1	4	1	0	0	1	1	1	2	1	6.3	1	10.3	1	0	127	2	1.4	2	11.09	2	9.08	2	124	2	6.11	2	0.12	1	4.63	2	0.99	2	235	2	4.68	1	3.13	1	237.37	1	2.83	2	51.55	1	1099.04
T001488520	51	0	1	1	4	0	0	0	1	1	1	2	1	1.8	1	16.7	1	0	158	2	2.43	2	10.79	2	12.04	2	152	2	6.44	2	0.07	2	4.94	2	0.99	2	147	2	4.99	1	3.29	1	148.48	2	2.3	2	51.75	1	733.52
T001524748	53	1	0	0	4	0	0	0	1	1	1	2	1	1.5	1	2.9	1	0	369	1	0.636	2	10.09	2	150.3	1	107	1	8.95	2	0.1	2	6.44	2	1.67	2	443	1	3.86	1	2.57	1	265.27	1	2.35	2	46.75	2	1708.34
T001574012	52	0	1	1	4	0	0	0	1	1	1	2	1	1.8	1	5.3	1	0	249	1	91.91	1	110	1	93.48	1	110	1	8.32	2	0.1	2	4.89	2	2.57	1	368	1	1.9	2	1.43	2	143.19	2	3.57	2	50.25	1	700.2
T001284218	82	0	0	0	4	0	1	0	1	1	1	2	1	8.3	1	15.3	1	0	167	2	2.37	2	9.8	2	10.42	2	139	2	3.47	2	0.2	1	2.3	2	0.65	2	101	2	3.54	1	1.97	2	155.38	2	2.1	2	41.15	2	357.38
T001527123	60	0	1	1	4	0	0	0	1	1	1	2	1	2.7	1	18.5	1	0	211	2	7.12	1	17.42	2	19.09	1	126	2	7.36	2	0.07	2	5.75	2	1.11	2	275	2	5.18	1	3.57	1	247.75	1	2.92	2	46.65	2	1424.55
T001693903	69	1	0	0	4	0	0	0	1	1	1	2	1	1.2	1	9.4	1	1	217	2	22.55	1	21.07	2	29.57	1	100	1	5.43	2	0.13	1	3.82	2	1.02	2	288	2	3.75	1	2.37	1	282.35	1	2.32	2	44.6	2	1078.59
T001534352	51	0	1	1	4	1	1	1	1	1	1	2	1	1.6	1	2	1	0	513	1	4.13	2	15.53	2	420.9	1	102	1	4.9	2	0.01	2	3.68	2	0.61	2	257	2	6.03	1	3.02	1	421.31	1	1.03	2	46.25	2	1550.43
T001484714	58	0	0	0	4	0	0	1	1	1	1	2	1	2	1	8.8	1	0	185	2	8.25	1	12	2	15.64	1	152	2	6.2	2	0.1	2	4.44	2	1.07	2	194	2	4.15	1	2.52	1	181.31	2	1.95	2	52.75	1	805.01
T001746270	60	1	0	0	4	0	1	0	1	1	1	2	1	3.5	1	17.7	1	1	154	2	1.55	2	7.71	2	13.3	2	119	1	4.36	2	0.03	2	2.72	2	1.27	2	244	2	2.14	2	1.66	2	192.13	1	3.97	2	52.65	1	522.58
T001658372	53	0	1	1	4	0	0	0	1	1	1	2	1	7.7	0	61.5	2	0	166	2	3.28	2	8.58	2	27.22	1	126	2	7.93	2	0.03	2	5.21	2	2.21	1	192	2	2.36	2	1.92	2	86.88	2	5.02	1	57.25	1	452.63
T001575479	58	0	1	1	4	0	0	0	1	1	1	2	1	4.1	1	9.5	1	0	293	1	3.09	2	9.23	2	11.5	2	115	1	4.5	2	0.05	2	3.46	2	0.64	2	178	2	5.41	1	3.33	1	278.13	1	1.88	2	50.8	1	962.31
T001545364	60	0	1	1	4	0	0	0	1	1	1	2	1	1.5	1	2.1	1	0	245	1	5.63	1	5.77	2	19.87	1	121	2	5.58	2	0.12	1	3.73	2	1.31	2	232	2	2.85	2	2.02	2	177.1	2	3.28	2	52.55	1	660.58
T001508725	66	1	0	0	4	0	0	1	1	1	1	2	1	2.3	1	16	1	0	431	1	3.19	2	8.17	2	22.69	1	115	1	4.06	2	0.04	2	3.02	2	0.67	2	161	2	4.51	1	2.9	1	240.3	1	2.16	2	51.85	1	725.7
T001593431	65	0	1	1	4	1	0	0	1	1	1	2	1	0.4	1	1	1	0	611	1	14.24	1	1094	1	54.69	1	99	1	3.8	2	0.01	2	2.84	2	0.64	2	74	2	4.44	1	2.96	1	115.63	2	2.13	2	39.2	2	328.38
T001688330	54	0	1	1	4	0	0	0	1	1	1	1	1	48	0	56.5	2	1	172	2	1.66	2	12.99	2	9.89	2	124	2	3.31	2	0.04	2	2.47	2	0.58	2	119	2	4.26	1	2.94	1	205.17	1	2.76	2	51.3	1	506.78
T001570008	64	0	1	1	4	1	0	0	1	1	1	2	1	5.8	1	19.4	1	1	328	1	2.28	2	6.58	2	20.47	1	103	1	7.28	2	0.09	2	5.31	2	1.34	2	186	2	3.96	1	2.7	1	138.81	2	2.53	2	49.2	2	737.06
T001700587	68	0	1	1	4	1	0	1	1	1	1	2	1	1.9	1	2	1	0	226	2	12.1	1	32.12	2	20.81	1	83	1	6.61	2	0.14	1	5.84	2	0.35	2	228	2	16.69	1	7.58	1	651.43	1	1.4	2	40.05	2	3804.34
T001452655	47	0	1	1	4	1	0	0	1	1	1	2	1	2	1	4	1	0	318	1	42.49	1	0.6	2	59.82	1	142	2	8.91	2	0.1	2	6.9	2	1.24	2	235	2	5.56	1	3.43	1	189.52	1	1.94	2	51.7	1	1307.66
T001282690	55	1	0	0	4	0	0	0	1	1	1	2	1	2.8	1	7	1	0	203	2	2.19	2	18.23	2	10.34	2	112	1	7.87	2	0.06	2	6.54	2	0.84	2	231	2	7.79	1	4.92	1	275	1	2.1	2	48.6	2	1798.5
T001594796	52	0	0	0	4	0	1	0	1	1	1	2	1	1.3	1	29.5	1	0	182	2	6.04	1	0.613	2	9.13	2	131	2	4.93	2	0.09	2	3.11	2	1.33	2	102	2	2.34	2	1.71	2	76.69	2	3.5	2	54.95	1	238.51
T001196794	65	0	1	1	4	1	1	0	1	1	1	2	1	1.3	1	14	1	0	166	2	10.89	1	105.4	1	18.56	1	137	2	6.26	2	0.04	2	3.67	2	2.08	1	206	2	1.76	2	1.42	2	99.04	2	4.52	1	54.5	1	363.47
T001605578	62	0	0	0	4	0	1	0	1	1	1	2	1	1.1	1	3.4	1	0	245	1	2.48	2	13.9	2	38.42	1	147	2	5.07	2	0.01	2	3.74	2	0.97	2	173	2	3.86	1	2.81	1	178.35	2	3.03	2	52.85	1	667.03
T001617721	56	0	1	1	4	1	1	0	1	4	1	2	1	1.4	1	18.8	1	1	465	1	1.3	2	11.82	2	19.58	1	103	1	3.78	2	0.16	1	2.69	2	0.55	2	114	2	4.89	1	2.47	1	207.27	1	1.53	2	46.95	2	557.56
T001749034	65	1	0	0	4	0	1	0	1	4	1	2	1	22.9	1	22.9	2	1	198	2	3	2	26.19	2	12.54	2	125	2	3.25	2	0.05	2	1.97	2	0.88	2	173	2	2.24	2	1.54	2	196.59	1	2.59	2	49.3	2	387.28
T001688793	58	0	1	1	4	0	1	0	1	4	1	1	1	5.4	1	19.6	2	1	175	2	0.569	2	2.3	2	22.02	1	128	2	4.22	2	0.09	2	2.97	2	0.88	2	250	2	3.38	1	2.38	1	284.09	1	3.38	2	48.2	2	843.75
T001759790	57	0	1	1	4	0	0	0	1	4	1	2	1	1.2	1	2.4	1	0	296	1	3.39	2	0.6	2	27.73	1	134	2	7.52	2	0.06	2	5.17	2	1.7	2	329	1	3.04	1	2.2	1	193.53	1	3.04	2	55.4	1	1000.55
T001702762	47	1	0	0	4	0	0	0	1	4	1	2	1	5.4	1	13.9	1	1	169	2	2.18	2	23.37	2	29.98	1	124	2	3.88	2	0.04	2	2.62	2	0.83	2	124	2	3.16	1	2.08	1	149.4	2	2.18	2	51.35	1	391.42
T001746039	76	1	0	0	4	0	0	0	1	4	1	2	1	4.2	1	7.9	1	0	210	2	18.69	1	24.71	2	21.14	1	114	1	5.71	2	0.14	1	3.97	2	1.18	2	256	2	3.36	1	2.28	1	216.95	1	3.03	2	50.4	1	861.29
T001787962	56	0	1	1	4	1	0	0	1	4	1	2	1	2.7	1	3	1	0	796	1	9.28	1	3.46	2	43.12	1	97	1	6.54	2	0.11	1	4.82	2	1.16	2	177	2	4.16	1	2.8	1	152.59	2	2.7	2	52.3	1	735.47
T001630604	67	1	0	0	4	1	1	0	1	4	1	2	1	4	1	10.1	1	1	279	1	1.7	2	18.37	2	38.87	1	142	2	5.69	2	0.02	2	3.4	2	1.85	1	164	2	1.84	2	1.48	2	88.65	2	4.63	1	55.95	1	301.41
T001739040	54	0	1	1	4	0	0	0	1	4	1	2	1	1.3	1	4.4	1	0	161	2	2.33	2	7.58	2	10.93	2	127	2	5.04	2	0.02	2	3.1	2	1.49	2	226	2	2.08	2	1.6	2	151.68	2	3.63	2	55.05	1	470.2
T001674962	56	0	1	1	4	1	0	0	1	4	1	2	1	5.6	1	5.6	2	1	287	1	12.86	1	6.31	2	15.61	1	154	2	5.6	2	0.11	1	4.33	2	0.76	2	189	2	5.7	1	3.41	1	248.68	1	2.11	2	48.5	2	1076.8
T001787430	59	0	1	1	4	1	0	0	1	4	1	1	1	1.2	1	6.3	1	0	151	2	6.38	1	79.8	1	14.04	2	112	1	9.18	2	0.41	1	6.21	2	1.58	2	422	1	3.93	1	2.09	1	267.09	1	1.72	2	55.6	1	1658.62
T001484947	65	0	1	1	4	0	1	0	1	4	1	1	1	4.3	1	20.8	1	0	173	2	3.41	2	49.68	1	7.81	2	117	1	4.9	2	0.13	1	3.32	2	1.05	2	145	2	3.16	1	2.1	1	138.1	2	2.92	2	48.65	2	458.48
T001665731	45	0	1	1	4	1	0	0	1	4	1	2	1	1.2	1	2.5	1	1	296	1	2.2	2	64.77	1	4941	1	150	2	3.49	2	0.01	2	2.83	2	0.43	2	119	2	6.58	1	4.29	1	276.74	1	2.05	2	52.35	1	783.19
T001584425	62	0	1	1	4	0	1	0	1	3	2	2	1	14.1	1	14.1	2	0	174	2	3.38	2	9.23	2	21.67	1	136	2	4.52	2	0.04	2	3.17	2	0.94	2	179	2	3.37	1	2.35	1	190.43	1	2.61	2	50.2	1	603.65
T001597395	63	1	1	1	4	0	1	0	1	3	2	2	1	5.9	1	9.3	2	1	300	1	3.61	2	19.79	2	14.49	2	139	2	8.14	2	0.2	1	6.63	2	0.68	2	192	2	9.75	1	4.39	1	282.35	1	1.15	2	45.1	2	1872
T001537071	54	0	1	1	3	0	0	0	1	3	2	2	0	62.8	0	62.8	2	1	156	2	3.14	2	24.02	2	12.81	2	135	2	7.4	2	0.11	1	5.83	2	0.95	2	265	2	6.14	1	3.71	1	278.95	1	1.98	2	46.25	2	1626.26
T001588814	65	0	1	1	4	0	0	0	1	1	1	1	1	3.9	1	4.3	2	0	223	2	1.16	2	7.11	2	20.11	1	126	2	5.17	2	0.02	2	3.97	2	0.82	2	328	1	4.84	1	3.31	1	400	1	2.34	2	47.2	2	1588
T001659114	43	0	1	1	4	1	0	1	1	3	2	1	1	8.8	1	14.2	1	0	184	2	15.38	1	13.15	2	24.7	1	122	2	9.24	2	0.01	2	7.12	2	1.49	2	368	1	4.78	1	3.36	1	246.98	1	2.61	2	49.25	2	1758.5
T001617545	65	1	0	0	4	0	0	0	1	4	1	1	0	44.3	0	44.3	2	0	159	2	2.32	2	13.32	2	11.79	2	119	1	1.96	2	0.05	2	1.19	2	0.62	2	117	2	1.92	2	1.55	2	188.71	2	6.89	1	48.1	2	224.56
T001616111	58	1	1	1	4	0	0	0	1	3	2	1	1	10.1	1	28.6	2	1	182	2	6.71	1	6.5	2	12.09	2	97	1	2.53	2	0.21	1	1.23	2	0.96	2	173	2	1.28	2	0.95	2	180.21	2	8.73	1	50.8	1	221.66
T001623629	56	0	1	1	4	0	1	0	1	3	2	2	1	5	1	7.2	1	0	349	1	0.588	2	3.73	2	22.62	1	118	1	3.75	2	0.03	2	3.03	2	0.41	2	136	2	7.39	1	4.21	1	331.71	1	1.52	2	44.25	2	1005.07
T001635913	66	0	1	1	4	1	0	1	1	3	2	2	1	1.4	1	7.7	1	0	339	1	19.7	1	15.72	2	149.6	1	104	1	3.85	2	0.03	2	3.27	2	0.36	2	157	2	9.08	1	5.64	1	436.11	1	2.4	2	45.9	2	1426.08
T001554006	69	0	1	1	4	0	1	0	1	3	2	2	1	1.4	1	6	1	0	161	2	2.26	2	12.92	2	10.57	2	85	1	4.72	2	0.04	2	3.17	2	0.98	2	208	2	3.23	1	2.05	1	212.24	1	1.96	2	48.8	2	672.82
T001731027	57	0	1	1	4	0	0	0	1	1	1	1	1	1.1	1	1.3	1	0	131	2	4.54	2	21.86	2	21.98	1	88	1	5.33	2	0.13	1	4.04	2	0.82	2	200	2	4.93	1	3.13	1	243.9	1	2.56	2	35.4	2	985.37
T001739337	57	0	1	1	4	0	0	0	1	3	2	1	1	10.4	1	37.6	1	0	182	2	2.67	2	16.52	2	18.06	1	139	2	9.32	2	0.08	2	8.11	1	0.84	2	228	2	9.65	1	6.7	1	271.43	1	3.11	2	53.5	1	2201.29
T001783039	54	0	1	1	4	0	0	0	1	3	2	2	1	7.9	1	13.4	2	0	257	1	2	2	14.55	2	11.72	2	124	2	10.77	1	0.06	2	6.86	2	3.06	1	238	2	2.24	2	1.75	2	77.78	2	4.03	2	61.5	1	533.56
T001785567	70	0	1	0	3	0	0	0	0	3	2	1	0	45.4	0	45.4	2	1	212	2	1.98	2	8.58	2	16.91	1	117	1	6.52	2	0.13	1	5.01	2	0.89	2	229	2	5.63	1	3.32	1	257.3	1	1.93	2	46.65	2	1289.09
T001798237	56	0	1	1	4	0	0	1	1	3	2	1	1	9.3	1	18	2	0	147	2	1.64	2	12.75	2	9.46	2	128	2	7.72	2	0.03	2	5.4	2	1.34	2	244	2	4.03	1	2.33	1	182.09	2	1.44	2	51.1	1	983.28
T001781829	62	0	1	1	4	0	1	0	1	1	1	2	1	4.4	1	24.7	1	0	468	1	5.77	1	16.27	2	37.8	1	132	2	7.74	2	0.29	1	5.17	2	1.79	1	208	2	2.89	2	2.01	2	116.2	2	4.07	2	56.15	1	600.76
T001736283	60	1	0	0	4	1	0	0	1	4	1	2	1	2.7	1	10.4	2	1	242	1	27	1	73.65	1	41.15	1	132	2	4.17	2	0.06	2	2.73	2	1.07	2	214	2	2.55	2	1.9	2	200	1	3.69	2	53.85	1	546
T001803298	61	0	1	1	4	0	0	0	1	3	2	1	1	21.7	1	21.7	2	1	194	2	2.43	2	7.88	2	12.45	2	132	2	6.1	2	0.08	2	4.46	2	1.15	2	178	2	3.88	1	2.72	1	154.78	2	2.95	2	49.25	2	690.33
T001811981	71	0	1	0	4	0	0	0	1	3	2	1	1	27	1	26.5	2	0	191	2	3.51	2	1.26	2	13.28	2	123	2	5.16	2	0.34	1	3.61	2	0.84	2	198	2	4.3	1	2.33	1	235.71	1	2.47	2	47.3	2	850.93
T001806996	65	0	0	0	3	0	0	0	1	3	2	1	1	9.8	0	43.8	2	0	155	2	4.32	2	7.48	2	11.61	2	162	2	6.55	2	0.37	1	3.96	2	1.72	1	151	2	2.3	2	1.53	2	87.79	2	3.66	2	54.1	1	347.65
T001651673	65	0	1	1	4	1	1	1	1	3	2	1	1	2.3	1	4.6	1	0	292	1	8.1	1	39.26	1	37.85	1	120	2	8.54	2	0.09	2	5.95	2	1.59	2	319	1	3.74	1	2.3	1	200.63	1	1.81	2	52.55	1	1193.74
T001597767	66	0	1	0	3	0	0	0	0	3	2	1	1	21.6	1	26.2	2	1	173	2	2.16	2	18.9	2	8.6	2	106	1	7.28	2	0.16	1	5.15	2	1.34	2	396	1	3.84	1	2.42	1	295.52	1	2.35	2	41.1	2	1521.94
T008205760	73	0	1	1	3	0	0	0	1	3	2	2	1	28.3	1	30.4	2	0	173	2	3.05	2	9.31	2	13.29	2	109	1	5.85	2	0.11	1	4.38	2	0.74	2	268	2	5.92	1	2.98	1	362.16	1	1.28	2	40.8	2	1586.27
T001595191	58	1	0	0	4	0	1	0	1	4	1	2	1	3.3	1	4	1	0	216	2	20.42	1	11.32	2	20.8	1	102	1	7.55	2	0.02	2	5.93	2	1.01	2	394	1	5.87	1	3.66	1	390.1	1	1.77	2	48.15	2	2313.29
T001719868	64	1	0	0	4	0	1	0	1	1	1	2	0	53.8	0	53.8	2	1	186	2	2.49	2	9.66	2	11.58	2	131	2	4.52	2	0.04	2	2.68	2	1.61	2	184	2	1.66	2	1.46	2	114.29	2	8.94	1	54.75	1	306.29
T001358277	65	0	0	0	4	0	0	0	1	1	1	2	1	1.2	1	2.2	1	0	136	2	2.46	2	16.86	2	14.91	2	122	2	10.29	1	0.12	1	7.16	2	2.12	1	425	1	3.38	1	2.29	1	200.47	1	2.52	2	53.4	1	1435.38
T001027456	63	0	1	1	4	0	0	0	1	1	1	2	1	0.6	1	1	1	0	155	2	3.43	2	6.23	2	13.15	2	105	1	9.79	2	0.13	1	7.88	2	0.97	2	276	2	8.12	1	4.13	1	284.54	1	1.24	2	42.95	2	2242.14
T001687070	62	0	1	1	3	0	0	0	1	1	1	2	1	13.9	1	26.8	2	1	196	2	7.5	1	16.97	2	13.81	2	128	2	6.34	2	0.27	1	4.24	2	1.27	2	201	2	3.34	1	2.02	2	158.27	2	2.4	2	51.45	1	671.06
T001721984	58	0	1	1	4	0	0	0	1	3	2	1	0	54.8	0	54.8	1	0	165	2	2.84	2	6.18	2	13.61	2	135	2	5.23	2	0.07	2	3.01	2	1.86	1	205	2	1.62	2	1.36	2	110.22	2	6.89	1	56.6	1	331.75
T001407328	65	0	1	1	4	0	0	0	1	1	1	2	1	13.9	1	38.6	2	0	223	2	2.04	2	26.15	2	12.95	2	147	2	5.86	2	0.06	2	3.66	2	1.67	2	187	2	2.19	2	1.66	2	111.98	2	3.63	2	53.95	1	409.83
T001642358	63	0	1	1	4	0	1	0	1	3	2	1	1	16.2	1	20.6	2	1	148	2	8.1	1	6.75	2	12.59	2	147	2	8.65	2	0.06	2	6.46	2	1.73	1	239	2	3.73	1	2.95	1	138.15	2	4.81	1	53.75	1	892.45
T001553742	56	0	1	1	4	0	1	0	1	3	2	1	1	5.5	1	30.5	2	1	161	2	4.12	2	9.67	2	26.18	1	141	2	5.71	2	0.02	2	3.96	2	1.42	2	132	2	2.79	2	2.26	1	92.96	2	4.73	1	52	1	368.11
T001618827	67	0	0	1	4	0	0	0	1	3	2	1	0	64.5	0	64.5	2	1	163	2	2.36	2	0.776	2	13.38	2	149	2	7.29	2	0.22	1	3.73	2	2.88	1	251	2	1.3	2	1.05	2	87.15	2	8	1	65	1	325.08
T001665708	64	0	0	1	4	1	0	0	1	3	2	1	1	3.2	1	17.5	1	1	197	2	5.13	1	17.01	2	17.37	1	131	2	4.3	2	0.02	2	3.12	2	0.76	2	209	2	4.11	1	2.64	1	275	1	2	2	43.6	2	858
T001638805	61	0	1	1	4	0	0	0	1	3	2	1	1	6.1	1	6.4	2	1	230	2	3.76	2	17.78	2	14.03	2	168	2	9.67	2	0.09	2	7.15	2	1.96	1	175	2	3.65	1	2.84	1	89.29	2	4.56	1	57.6	1	638.39
T001662919	62	0	1	1	4	0	0	0	1	3	2	1	1	4.1	1	8.3	1	1	233	2	1.57	2	4.65	2	20.04	1	130	2	9.15	2	0.04	2	7.52	2	0.93	2	265	2	8.09	1	4.61	1	284.95	1	1.45	2	47.35	2	2142.8
T001500247	67	0	1	1	4	0	0	0	1	3	2	1	0	63.4	0	63.4	2	1	169	2	2.44	2	4.42	2	13.31	2	153	2	6.08	2	0.04	2	4.49	2	1.12	2	205	2	4.01	1	2.82	1	183.04	2	2.8	2	51.1	1	821.83
T001660434	66	0	0	0	4	1	1	0	1	3	2	1	1	15.5	1	15.6	2	1	148	2	2.34	2	7.6	2	20.54	1	134	2	10.6	1	0.1	2	9.32	1	0.85	2	255	2	10.96	1	7.28	1	300	1	2.93	2	50.15	1	2796
T001662758	63	1	0	0	4	0	0	1	1	3	2	1	1	28.5	1	28.5	2	1	269	1	4.31	2	11.9	2	20.35	1	130	2	7.11	2	0.04	2	4.97	2	1.74	1	249	2	2.86	2	2.32	1	143.1	2	5.61	1	57.3	1	711.22
T001670152	67	0	1	1	4	0	0	0	1	3	2	1	1	13.8	1	26.9	2	1	215	2	1.62	2	6.33	2	13.15	2	135	2	8.3	2	0.12	1	6.09	2	1.6	2	199	2	3.81	1	2.76	1	124.38	2	3.33	2	46.1	2	757.44
T001665277	71	0	1	1	4	0	1	0	1	3	2	1	0	59.7	0	59.7	2	1	253	1	3.16	2	0.937	2	15.7	1	144	2	10.55	1	0.24	1	7.8	2	1.86	1	249	2	4.19	1	2.84	1	133.87	2	2.95	2	52.1	1	1044.19
T001717779	63	0	0	0	4	0	1	0	1	3	2	1	1	33.7	1	48.7	2	1	155	2	6.95	1	35.2	2	18.22	1	163	2	5.83	2	0.25	1	3.49	2	1.67	2	203	2	2.09	2	1.49	2	121.56	2	4.39	1	55.15	1	424.23
T001726523	55	0	1	1	4	0	0	0	1	3	2	1	1	31.9	1	34	2	1	165	2	5.61	1	4.91	2	17.97	1	123	2	10.18	1	0.13	1	7.84	2	1.48	2	530	1	5.3	1	3.35	1	358.11	1	2.18	2	49.8	1	2807.57
T001591703	55	0	1	1	4	0	0	0	1	3	2	1	1	10	1	12.2	2	1	395	1	1.64	2	10.04	2	44.93	1	146	2	4.75	2	0.07	2	2.84	2	1.47	2	230	2	1.93	2	1.49	2	156.46	2	4.32	2	59.15	1	444.35
T001781257	62	0	1	1	4	0	0	0	1	3	2	1	1	32.4	1	32.8	2	1	177	2	2.62	2	17.4	2	12.76	2	155	2	6.46	2	0.13	1	4.72	2	1.17	2	175	2	4.03	1	2.71	1	149.57	2	3	2	50.35	1	705.98
T001773956	57	0	1	1	4	0	0	0	1	3	2	1	1	17.6	1	17.6	2	0	162	2	2.21	2	12.18	2	17.59	1	135	2	18.71	1	0.27	1	13.89	1	2.99	1	147	2	4.65	1	2.88	1	49.16	2	1.97	2	51.05	1	682.89
T001744051	57	0	1	0	4	0	0	1	1	3	2	1	1	3.7	1	8.2	2	1	398	1	10.41	1	11.76	2	34.16	1	148	2	7.59	2	0.04	2	5.68	2	1.35	2	242	2	4.21	1	2.97	1	179.26	2	2.7	2	52.05	1	1018.19
T001771752	61	0	1	1	4	0	0	0	1	3	2	1	1	19.9	1	29.4	2	1	182	2	4.31	2	37.34	1	14.15	2	124	2	7.53	2	0.01	2	5.22	2	1.87	1	297	2	2.79	2	2.26	1	158.82	2	4.79	1	51.95	1	829.06
T001748790	69	0	1	1	4	0	0	0	1	3	2	1	1	26.8	1	32.9	2	1	171	2	2.44	2	10.16	2	9.81	2	143	2	7.71	2	0.09	2	5.6	2	1.72	1	250	2	3.26	1	2.65	1	145.35	2	6.37	1	51.3	1	813.95
T001704119	66	0	1	1	4	0	0	0	1	3	2	1	1	2.93333	1	6.3	1	1	207	2	3.78	2	11.92	2	12.75	2	114	1	8.8	2	0.06	2	6.65	2	1.37	2	226	2	4.85	1	3.09	1	164.96	2	1.99	2	48.25	2	1097.01
T001707439	62	1	0	0	4	1	0	0	1	3	2	1	1	16.7	0	55.5	2	1	202	2	6.53	1	18.21	2	14.35	2	137	2	7.62	2	0.03	2	4.81	2	2.44	1	229	2	1.97	2	1.71	2	93.85	2	7.39	1	56.7	1	451.43
T001711432	70	0	1	1	4	1	0	0	1	3	2	1	1	11.3333	1	38.4	2	1	1484	1	1.95	2	6.05	2	13.66	2	133	2	6.17	2	0.05	2	4.44	2	1.28	2	307	1	3.47	1	2.57	1	239.84	1	3.37	2	45.5	2	1064.91
T001750413	67	0	1	1	4	0	0	1	1	3	2	1	1	33.9333	1	45.1	2	1	252	1	17.75	1	26.71	2	15.8	1	130	2	6.24	2	0.04	2	4.67	2	1.09	2	355	1	4.28	1	2.97	1	325.69	1	2.66	2	49.25	2	1520.96
T001729091	64	0	1	1	4	0	0	0	1	3	2	1	0	52.2667	0	52.3	2	1	191	2	5.12	1	28.72	2	20.13	1	148	2	6.39	2	0.07	2	4.11	2	1.89	1	185	2	2.17	2	1.8	2	97.88	2	6.3	1	53.85	1	402.3
T001715046	58	0	1	1	4	0	0	1	1	3	2	1	1	18.9667	1	28.9	2	1	158	2	3.84	2	15.04	2	12.95	2	171	2	12.68	1	0.33	1	8.68	1	2.96	1	312	1	2.93	2	2.17	1	105.41	2	4.48	1	65.1	1	914.92
T001755328	61	0	0	1	4	0	0	0	0	3	2	1	1	6.86667	1	9.3	2	1	200	2	1.51	2	12.78	2	16.28	1	146	2	4.18	2	0.06	2	2.69	2	1.11	2	200	2	2.42	2	1.81	2	180.18	2	3.7	2	47.45	2	484.68
T001664463	62	0	0	0	4	1	0	0	1	3	2	1	1	6.1	1	15	2	1	225	2	3.09	2	40.45	1	18.34	1	157	2	5.74	2	0.1	2	4.19	2	1.01	2	311	1	4.15	1	2.7	1	307.92	1	2.35	2	51.05	1	1290.19
T001590525	67	0	1	1	4	0	0	0	1	3	2	1	1	7.23333	1	13.8	2	0	155	2	6.21	1	22.93	2	14.78	2	129	2	6.46	2	0.29	1	4.34	2	1.17	2	149	2	3.71	1	2.05	1	127.35	2	1.86	2	49.05	2	552.7
T001660330	70	0	0	0	4	0	1	0	1	3	2	2	1	29.0333	1	60.5	2	0	167	2	1.58	2	8.27	2	7.89	2	116	1	3.57	2	0.07	2	2.18	2	0.96	2	143	2	2.27	2	1.57	2	148.96	2	2.74	2	49.6	1	324.73
T001621552	65	0	0	1	4	0	0	0	1	3	2	1	1	3.96667	1	5	1	1	201	2	1.51	2	9.33	2	15.45	1	141	2	4.49	2	0.01	2	3.69	2	0.56	2	108	2	6.59	1	4.61	1	192.86	1	2.55	2	48.2	2	711.64
T001685356	61	0	1	1	4	1	0	1	1	3	2	1	1	4.13333	1	7.4	1	1	215	2	3.2	2	36.71	2	12.71	2	146	2	12.09	1	2.31	1	6.82	2	2.19	1	192	2	3.11	1	1.29	2	87.67	2	3.04	2	57.45	1	597.92
T001730455	68	0	1	1	4	0	1	0	1	3	2	1	0	54.5333	0	54.5	2	1	170	2	1.43	2	7.27	2	12.45	2	107	1	6.04	2	0.15	1	3.55	2	1.81	1	310	1	1.96	2	1.43	2	171.27	2	3.69	2	51.55	1	608.01
T001803001	65	0	1	1	4	0	0	0	1	3	2	1	1	24.5	1	39.1	2	1	181	2	3.13	2	6.98	2	10.72	2	126	2	4.88	2	0.04	2	3.48	2	1.11	2	188	2	3.14	1	2.49	1	169.37	2	4.63	1	50.85	1	589.41
T001802678	56	0	0	1	4	0	0	0	1	3	2	1	1	11.4	1	12	2	1	173	2	3.08	2	13.19	2	15.89	1	138	2	6.69	2	0.07	2	4.86	2	1.37	2	208	2	3.55	1	2.66	1	151.82	2	3.7	2	51.95	1	737.87
T001805962	61	0	1	1	4	1	0	0	1	3	2	1	1	8.5	1	22	2	1	1176	1	3.84	2	10.02	2	14.59	2	142	2	4.52	2	0.14	1	3.17	2	0.95	2	236	2	3.34	1	2.35	1	248.42	1	3.96	2	54.25	1	787.49
T001866059	58	0	1	1	4	0	0	0	1	3	2	1	1	6.33333	0	38.7	2	1	232	2	13.31	1	2.31	2	29.12	1	112	1	9.78	2	0.29	1	7.15	2	1.87	1	229	2	3.82	1	2.72	1	122.46	2	4.45	1	55.15	1	875.59
T001429638	54	0	1	1	4	0	0	0	1	3	2	1	1	13.5333	0	41.6	2	1	173	2	4.01	2	10.21	2	16.82	1	151	2	7.39	2	0.64	1	4.91	2	1.3	2	210	2	3.78	1	1.98	2	161.54	2	2.5	2	52	1	793.15
T001738378	49	0	1	1	4	1	0	0	1	3	2	1	1	32.8	1	39.1	2	0	189	2	3.09	2	3.81	2	15.73	1	142	2	9.12	2	0.04	2	6.2	2	2.3	1	313	1	2.7	2	2.12	1	136.09	2	4.11	2	56.5	1	843.74
9571366	66	0	0	0	4	0	0	0	1	3	2	1	1	20.5	0	33.3	1	0	194	2	3.82	2	16	2	14.32	2	103	1	6.84	2	0.09	2	4.57	2	1.65	2	254	2	2.77	2	2.01	2	153.94	2	3.17	2	51.85	1	703.5
T001540694	65	1	0	0	4	0	1	0	1	1	1	2	1	5.6	1	23	1	1	201	2	1.15	2	10.4	2	13.17	2	126	2	4.95	2	0.16	1	3.47	2	1.01	2	181	2	3.44	1	2.34	1	179.21	2	3.48	2	50.85	1	621.85
T001642717	58	0	1	1	4	0	0	1	1	1	1	1	1	12.9333	1	23.4	2	0	180	2	2.81	2	16.16	2	9.75	2	103	1	3.14	2	0.06	2	2.32	2	0.38	2	157	2	6.11	1	2.83	1	413.16	1	1.09	2	43.7	2	958.53
T001663256	65	0	1	1	4	0	0	0	1	1	1	2	1	15.8333	1	38.5	2	0	223	2	2.04	2	26.15	2	12.95	2	147	2	5.86	2	0.06	2	3.66	2	1.67	2	187	2	2.19	2	1.66	2	111.98	2	3.63	2	53.95	1	409.83
T001811829	52	0	1	1	4	0	0	0	1	3	2	1	1	5.8	1	10.9	1	0	152	2	1.37	2	0.638	2	8.46	2	97	1	4.73	2	0.01	2	3.46	2	0.94	2	99	2	3.68	1	2.72	1	105.32	2	2.94	2	47.3	2	364.4
T001827958	63	0	1	1	4	0	0	0	1	3	2	2	1	8.96667	0	33	1	1	175	2	2.28	2	8.66	2	15.58	1	135	2	5.52	2	0.1	2	2.97	2	1.92	1	225	2	1.55	2	1.16	2	117.19	2	3.76	2	48.4	2	348.05
T001866127	44	0	1	1	4	0	0	0	1	4	1	2	1	5.6	1	23.8	2	0	283	1	1.77	2	3.28	2	17.54	1	134	2	7.13	2	0.21	1	4.98	2	1.46	2	212	2	3.41	1	2.32	1	145.21	2	3.17	2	53.7	1	723.12
T001877306	60	0	1	1	4	1	0	0	1	3	2	1	1	10.2333	1	21.8	2	0	198	2	8.26	1	17.7	2	13.24	2	132	2	7.17	2	0.18	1	5.11	2	1.46	2	184	2	3.5	1	2.48	1	126.03	2	3.74	2	52.5	1	644
T001913765	70	0	1	1	4	0	0	0	1	3	2	1	1	9.73333	1	11.9	1	0	173	2	3.46	2	13.01	2	15.01	2	157	2	8.66	2	0.07	2	5.54	2	2.48	1	159	2	2.23	2	1.78	2	64.11	2	4.59	1	56.2	1	355.19
T001905867	72	0	1	0	4	0	0	0	0	3	2	1	0	35.3333	0	35.3	1	0	208	2	1.68	2	4.03	2	12.97	2	135	2	5.93	2	0.01	2	4.68	2	0.91	2	271	2	5.14	1	3.74	1	297.8	1	2.84	2	48.85	2	1393.71
T001905350	72	0	1	0	4	0	0	0	1	3	2	1	0	35.1333	0	35.1	2	1	169	2	3.32	2	8.64	2	12.49	2	131	2	7.3	2	0.59	1	4.4	2	1.93	1	330	1	2.28	2	1.52	2	170.98	2	5.51	1	52.65	1	752.33
T001909554	68	0	1	0	4	0	1	0	1	3	2	1	1	26.1333	1	28.2	2	1	184	2	2.37	2	1.49	2	13.01	2	176	2	9.16	2	0.04	2	7.04	2	1.46	2	179	2	4.82	1	3.32	1	122.6	2	2.43	2	57.5	1	863.12
T001919202	66	0	1	0	4	0	1	0	1	3	2	1	1	3.76667	1	16.9	1	0	179	2	4.06	2	28.2	2	15.42	1	156	2	9.14	2	0.08	2	6.94	2	1.48	2	236	2	4.69	1	3.15	1	159.46	2	2.51	2	54	1	1106.65
T001973596	58	0	1	1	4	0	0	0	1	4	1	1	1	8.43333	1	18.3	2	1	219	2	2.03	2	7.24	2	9.84	2	125	2	4.37	2	0.18	1	3.08	2	0.76	2	192	2	4.05	1	2.39	1	252.63	1	2.3	2	44.8	2	778.11
T001980284	64	0	1	1	4	1	0	0	1	3	2	1	1	9.63333	0	30.2	2	1	957	1	2.7	2	6.01	2	45.11	1	146	2	5.78	2	0.21	1	3.32	2	1.82	1	269	2	1.82	2	1.35	2	147.8	2	4.55	1	53	1	490.7
T001790933	56	1	0	0	4	1	0	0	1	4	1	1	1	1.4	1	7.3	1	1	238	2	8.75	1	404.2	1	13.56	2	119	1	4.28	2	0.05	2	2.5	2	1.48	2	178	2	1.69	2	1.4	2	120.27	2	6.17	1	52.4	1	300.68
T002000330	48	0	1	1	4	0	0	1	1	3	2	1	1	4.3	1	6.7	2	0	196	2	0.62	2	4.27	2	14.9	2	105	1	12.03	1	0.57	1	9.05	1	1.25	2	509	1	7.24	1	3.04	1	407.2	1	1.13	2	50.25	1	3685.16
T002010873	54	0	1	1	4	1	1	0	1	4	1	1	1	2.13333	1	13	1	0	138	2	4.71	2	10.14	2	14.76	2	77	1	5.45	2	0.04	2	4.27	2	0.79	2	180	2	5.41	1	3.62	1	227.85	1	2.26	2	42.95	2	972.91
T001995582	70	0	1	1	4	0	0	0	1	4	1	1	1	1.66667	1	8.1	1	1	167	2	2.95	2	27.01	2	10.19	2	113	1	4.94	2	0.06	2	3.51	2	1.07	2	104	2	3.28	1	2.45	1	97.2	2	4.12	2	45.05	2	341.16
T001998236	48	0	0	1	4	0	0	0	1	3	2	1	1	7.23333	1	12.1	2	0	226	2	2.18	2	18.57	2	17.32	1	180	2	7.47	2	0.31	1	5.1	2	1.44	2	273	2	3.54	1	2.15	1	189.58	1	2.57	2	54.3	1	966.88
T001985587	61	0	1	1	4	0	0	1	1	3	2	1	1	0.6	1	1.2	1	0	1461	1	34.44	1	12.46	2	74.33	1	89	1	7.3	2	0.11	1	4.67	2	1.69	2	249	2	2.76	2	1.78	2	147.34	2	2.09	2	43.85	2	688.07
T001999173	71	0	0	0	4	1	0	0	1	3	2	1	1	2.03333	0	8.3	1	0	161	2	4.8	2	17.15	2	16.22	1	158	2	6.71	2	0.02	2	4.02	2	2.29	1	224	2	1.76	2	1.49	2	97.82	2	6.36	1	60.35	1	393.22
T001583990	70	0	0	0	4	0	1	0	1	4	1	2	1	8.43333	1	8.7	2	1	218	2	14.18	1	0.659	2	23.77	1	122	2	6.96	2	0.06	2	5.23	2	1.07	2	242	2	4.89	1	3.02	1	226.17	1	1.88	2	46.85	2	1182.86
T001781129	55	0	1	1	4	1	0	0	1	1	1	1	1	6.23333	1	15.1	2	0	197	2	2.13	2	18.42	2	11.08	2	137	2	3.47	2	0.05	2	2.57	2	0.58	2	146	2	4.43	1	2.86	1	251.72	1	2.23	2	48.4	2	646.93
T001787080	62	0	1	0	4	0	0	0	1	3	2	1	1	8.5	1	12.6	1	0	249	1	1.05	2	10.04	2	10.86	2	135	2	4.15	2	0.22	1	2.23	2	1.39	2	163	2	1.6	2	1.16	2	117.27	2	4.96	1	44.55	2	261.5
T001791103	63	0	0	0	4	0	0	0	1	3	2	1	1	8.36667	1	12.2	2	0	446	1	1.68	2	50.68	1	78.2	1	155	2	4.83	2	0.05	2	3.63	2	0.95	2	166	2	3.82	1	3.03	1	174.74	2	4.75	1	51.75	1	634.29
T001823181	61	0	1	0	4	0	1	0	1	3	2	1	0	31	0	31	2	1	183	2	1.36	2	12.73	2	17.2	1	149	2	5.27	2	0.18	1	2.86	2	1.94	1	247	2	1.47	2	1.19	2	127.32	2	7.19	1	52.1	1	364.13
T001839014	89	0	0	0	4	0	0	0	0	4	1	1	1	5.16667	1	13.2	1	0	187	2	1.39	2	7.28	2	13.01	2	132	2	6.37	2	0.08	2	5.32	2	0.61	2	168	2	8.72	1	5.07	1	275.41	1	1.79	2	43.35	2	1465.18
T001904143	70	0	1	1	4	0	0	0	1	3	2	1	1	15.7667	1	31.2	1	1	167	2	5.62	1	1	2	13.02	2	129	2	4.5	2	0.04	2	3.06	2	0.98	2	206	2	3.12	1	2.13	1	210.2	1	2.39	2	44.5	2	643.22
T001908193	49	0	1	1	4	0	0	0	0	4	1	2	1	5.23333	0	22.5	1	0	185	2	0.692	2	10.14	2	14.54	2	114	1	8.8	2	0.04	2	7.86	2	0.4	2	88	2	19.65	1	8.36	1	220	1	0.8	2	40.7	2	1729.2
T001906561	53	0	1	1	4	0	1	0	1	4	1	1	1	4.36667	1	17.6	2	1	217	2	4.44	2	22.59	2	18.03	1	135	2	4.69	2	0.15	1	3.13	2	1.15	2	184	2	2.72	2	2.01	2	160	2	4.79	1	56.25	1	500.8
T001889831	57	0	1	1	4	0	1	1	1	3	2	2	1	1.36667	0	31.1	1	0	154	2	2.42	2	4.54	2	14.45	2	118	1	11.13	1	0.24	1	7.4	2	2.61	1	338	1	2.84	2	1.98	2	129.5	2	3.14	2	55.65	1	958.31
T001947008	79	0	0	0	3	0	0	0	0	3	2	1	1	6.9	0	32.7	1	0	269	1	1.5	2	6.65	2	12.29	2	144	2	4.64	2	0.06	2	3.16	2	0.82	2	136	2	3.85	1	2.14	1	165.85	2	1.41	2	46.4	2	524.1
T001920969	53	0	1	0	3	0	0	0	0	3	2	1	0	10.3667	0	10.4	2	0	183	2	1.89	2	14.6	2	15.49	1	146	2	5.1	2	0.06	2	3.9	2	0.84	2	204	2	4.64	1	3.25	1	242.86	1	2.9	2	45.4	2	947.14
T002014434	64	0	1	0	4	0	0	0	1	3	2	1	1	9.73333	0	27.4	2	0	145	2	2.13	2	11.49	2	17.56	1	130	2	5.94	2	0.09	2	3.21	2	2.25	1	330	1	1.43	2	1.18	2	146.67	2	6.25	1	52.25	1	470.8
T002024788	66	0	1	1	4	0	0	0	1	3	2	1	1	6.8	1	7.2	2	1	197	2	2.28	2	10.11	2	18.41	1	131	2	6.09	2	0.14	1	4.35	2	1.22	2	236	2	3.57	1	2.5	1	193.44	1	3.39	2	46.8	2	841.48
T001559153	55	0	1	1	4	0	0	0	1	4	1	2	0	29.7	0	29.7	2	1	159	2	4.14	2	14.77	2	14.74	2	146	2	6.71	2	0	2	5.97	2	0.7	2	213	2	8.53	1	8.07	1	304.29	1	17.5	1	48.5	2	1816.59
T001720253	56	0	1	1	4	1	1	0	1	3	2	1	1	11	1	13.4	2	1	259	1	2.33	2	18.11	2	22.93	1	135	2	9.97	2	0.38	1	5.86	2	2.58	1	291	2	2.27	2	1.43	2	112.79	2	2.32	2	57.1	1	660.95
T001759256	60	0	1	1	4	1	0	0	1	4	1	1	1	6.76667	1	10.8	1	0	390	1	58.15	1	271.9	1	31.82	1	82	1	22.93	1	0.3	1	20.88	1	0.84	2	264	2	24.86	1	10.19	1	314.29	1	0.98	2	33.4	2	6562.29
T001773038	58	0	1	1	4	0	0	0	1	3	2	1	1	6.06667	1	28.7	2	1	161	2	19.32	1	53.27	1	15.76	1	154	2	11.7	1	0.34	1	8.05	1	2.63	1	187	2	3.06	1	2.21	1	71.1	2	4.11	2	49.15	2	572.38
T001787885	72	0	1	0	4	0	1	0	1	4	1	2	1	4.26667	1	9	2	0	199	2	4.23	2	37.55	1	12	2	145	2	6.3	2	0.2	1	4.01	2	1.64	2	94	2	2.45	2	1.75	2	57.32	2	3.81	2	54.5	1	229.84
T001787283	61	0	1	1	4	0	0	0	1	3	2	1	1	1.03333	1	2.3	1	1	186	2	5.88	1	9.58	2	12.46	2	128	2	6.61	2	0	2	5.23	2	0.92	2	233	2	5.68	1	3.79	1	253.26	1	2.04	2	47.4	2	1324.55
T001807262	60	1	0	0	4	0	0	0	1	3	2	1	0	13.0667	0	13.1	2	1	201	2	1.65	2	6.3	2	12.41	2	127	2	4.54	2	0.01	2	2.97	2	1.31	2	254	2	2.27	2	1.89	2	193.89	1	5.7	1	48.05	2	575.86
T001782369	77	0	1	0	4	0	0	0	1	1	1	2	1	2.56667	1	7.5	1	0	194	2	2.14	2	14.98	2	7.86	2	153	2	8.52	2	0.24	1	6.48	2	1.14	2	186	2	5.68	1	3.18	1	163.16	2	1.84	2	50.8	1	1057.26
T001846185	60	0	1	1	4	0	0	0	1	3	2	2	1	5.06667	1	17.7	2	1	147	2	3.44	2	16.94	2	10.02	2	121	2	6.85	2	0.07	2	5.28	2	1.06	2	197	2	4.98	1	3.36	1	185.85	2	2.59	2	51.8	1	981.28
T001906432	54	0	1	1	4	0	0	0	1	3	2	1	1	24.4667	1	26.5	2	1	198	2	4.26	2	112.4	1	14.64	2	138	2	11.15	1	0.08	2	9.01	1	1.13	2	324	1	7.97	1	4.21	1	286.73	1	1.26	2	48.65	2	2583.4
T001896378	56	0	0	1	4	1	0	1	1	3	2	2	0	31.5333	0	31.5	2	1	180	2	0.995	2	7.84	2	11.45	2	128	2	6.43	2	0.05	2	4.78	2	1.13	2	154	2	4.23	1	2.9	1	136.28	2	2.57	2	51.35	1	651.43
T001928042	68	0	0	1	4	0	0	0	1	3	2	1	1	3.86667	1	4.4	2	0	189	2	2.18	2	14.22	2	12.79	2	141	2	8.43	2	0.02	2	7.02	2	0.83	2	241	2	8.46	1	4.98	1	290.36	1	1.54	2	46.95	2	2038.34
T001939824	62	0	0	0	4	0	1	0	1	4	1	2	1	9.13333	1	9.8	2	1	231	2	2.51	2	18.58	2	15.44	1	148	2	5.14	2	0.08	2	3.87	2	0.87	2	185	2	4.45	1	3.05	1	212.64	1	2.9	2	47.55	2	822.93
T001926497	67	0	1	1	4	1	1	0	1	4	1	2	1	1.46667	1	4.5	1	0	270	1	2.32	2	6.66	2	22.71	1	115	1	6.29	2	0.08	2	4.51	2	1.21	2	314	1	3.73	1	2.53	1	259.5	1	2.81	2	44.05	2	1170.36
T002004023	66	0	1	1	4	0	0	0	1	3	2	1	1	9.2	1	15.2	1	1	208	2	1.79	2	13.94	2	12.2	2	125	2	13.19	1	0.22	1	10.36	1	1.84	1	262	2	5.63	1	3.66	1	142.39	2	2.52	2	52.8	1	1475.17
T002015587	58	0	1	1	4	1	0	1	1	3	2	1	1	8.36667	1	8.8	2	1	190	2	9.65	1	20.56	2	16.81	1	128	2	9	2	0.15	1	6.93	2	1.25	2	266	2	5.54	1	3.35	1	212.8	1	2.02	2	52.45	1	1474.7
T001995551	51	0	1	1	4	0	0	0	1	3	2	1	1	11.3667	1	11.9	2	0	167	2	1.27	2	3.86	2	13.81	2	138	2	5.71	2	0.06	2	3.96	2	1.36	2	189	2	2.91	2	2.26	1	138.97	2	4.69	1	49.4	2	550.32
T002006508	44	0	0	0	4	0	0	0	1	3	2	1	0	26.4667	0	26.5	2	1	175	2	1.06	2	97.55	1	10.16	2	156	2	4.87	2	0.15	1	3.32	2	1.14	2	193	2	2.91	2	2.14	1	169.3	2	4.75	1	53.6	1	562.07
T002001131	51	0	1	1	4	1	0	0	1	4	1	1	1	1.93333	1	18.6	1	0	245	1	0.714	2	1.31	2	73.7	1	131	2	6.59	2	0.13	1	5.34	2	0.74	2	350	1	7.22	1	4.27	1	472.97	1	2.06	2	45.6	2	2525.68
T002023246	54	0	1	1	3	0	0	0	0	3	2	1	0	26.7	0	26.7	2	0	195	2	5.91	1	5.53	2	12.54	2	157	2	5.05	2	0.2	1	2.31	2	2.11	1	198	2	1.09	2	0.84	2	93.84	2	5.15	1	57.15	1	216.77
T002038356	67	0	1	1	4	0	0	0	1	3	2	1	1	9.4	1	11.3	1	0	132	2	1.02	2	8.62	2	10.27	2	146	2	4.69	2	0.04	2	3.63	2	0.7	2	240	2	5.19	1	3.42	1	342.86	1	2.26	2	46.7	2	1244.57
T001602504	59	0	1	1	4	0	1	0	1	4	1	2	1	9.16667	1	10.4	2	1	143	2	1.23	2	8.95	2	13.61	2	107	1	8.24	2	0.06	2	6.29	2	1.33	2	333	1	4.73	1	3.23	1	250.38	1	2.46	2	47.65	2	1574.86
T001760033	53	0	0	0	4	0	0	0	1	3	2	2	1	15.8333	1	17.6	2	0	185	2	3.35	2	27.16	2	8.85	2	121	2	5.53	2	0.07	2	4.03	2	0.99	2	161	2	4.07	1	2.69	1	162.63	2	2.36	2	45.75	2	655.38
T001837535	75	0	1	1	4	0	0	0	1	3	2	2	1	8.26667	1	9.4	1	1	182	2	1.76	2	8.64	2	12.02	2	95	1	2.92	2	0.03	2	2.04	2	0.47	2	143	2	4.34	1	2.32	1	304.26	1	1.27	2	36.75	2	620.68
T001819279	68	1	0	0	4	0	0	0	1	3	2	1	1	6.16667	1	28.5	2	0	217	2	2.13	2	2.05	2	10.77	2	112	1	6.11	2	0.04	2	4.41	2	1.3	2	375	1	3.39	1	2.59	1	288.46	1	3.82	2	49.5	2	1272.12
T001843470	74	0	1	1	4	0	0	0	1	3	2	1	1	13.9	1	15.7	2	0	170	2	1.29	2	7.96	2	7.18	2	120	2	10.41	1	0.28	1	7.8	2	1.83	1	236	2	4.26	1	2.99	1	128.96	2	4.07	2	51.35	1	1005.9
T001852469	59	0	0	0	4	0	0	0	1	3	2	1	1	9.33333	1	24.6	2	0	231	2	4.78	2	12.01	2	7.21	2	113	1	24.51	1	0.31	1	17.39	1	3.14	1	224	2	5.54	1	2.44	1	71.34	2	0.88	2	51.8	1	1240.56
T001875503	68	0	1	0	4	0	0	0	1	3	2	1	1	1.8	1	2.8	1	0	114	2	5.52	1	13.18	2	10.39	2	124	2	10.95	1	0.03	2	9.31	1	0.78	2	510	1	11.94	1	5.68	1	653.85	1	0.99	2	41.2	2	6087.31
T001856254	63	0	1	1	4	0	0	0	1	3	2	1	1	8.66667	1	27.4	2	1	192	2	0.384	2	3.22	2	14.24	2	153	2	7.52	2	0.14	1	5.07	2	1.83	1	212	2	2.77	2	2.07	1	115.85	2	3.98	2	52.55	1	587.34
T001854510	46	0	1	0	4	0	0	0	1	4	1	2	1	9.8	1	12.6	2	0	156	2	1.48	2	10.57	2	9.96	2	132	2	2.94	2	0.05	2	1.86	2	0.63	2	90	2	2.95	2	1.72	2	142.86	2	1.62	2	49.05	2	265.71
T001884137	70	0	1	1	4	0	0	0	1	3	2	1	1	16.0667	0	36.7	2	1	244	1	3.79	2	15.6	2	12.17	2	146	2	5.53	2	0.09	2	3.15	2	1.84	1	186	2	1.71	2	1.32	2	101.09	2	4.38	1	50.1	1	318.42
T001891157	58	0	1	1	3	0	0	0	0	3	2	1	0	3.06667	0	3.1	2	0	265	1	2.22	2	50.72	1	10.27	2	137	2	7.75	2	0.07	2	4.75	2	2.15	1	245	2	2.21	2	1.58	2	113.95	2	2.83	2	54.05	1	541.28
T001909664	52	0	1	1	4	1	0	1	1	3	2	2	1	9.13333	1	25.8	2	0	147	2	0.942	2	12	2	15.01	2	127	2	4.86	2	0.07	2	3.59	2	0.86	2	225	2	4.17	1	2.83	1	261.63	1	2.61	2	53.2	1	939.24
T001891523	62	0	1	1	4	0	0	0	1	4	1	2	1	4.43333	1	8.4	2	1	213	2	2.11	2	7.5	2	15.71	1	106	1	12.49	1	0.19	1	8.82	1	2.21	1	316	1	3.99	1	2.4	1	142.99	2	1.81	2	52.45	1	1261.14
T001923376	56	0	1	0	4	1	1	0	1	4	1	2	1	2.96667	1	3.7	1	0	193	2	2.56	2	3.89	2	27.8	1	89	1	5.03	2	0.02	2	3.71	2	0.89	2	300	2	4.17	1	2.81	1	337.08	1	2.34	2	49.45	2	1250.56
T001974934	66	0	1	1	4	0	0	0	1	3	2	1	1	10.6667	1	10.7	2	0	221	2	5.53	1	1.26	2	13.63	2	123	2	5.11	2	0.04	2	2.08	2	2.74	1	243	2	0.76	2	0.69	2	88.69	2	11.91	1	57.6	1	184.47
T001954638	55	0	1	0	4	0	1	0	1	4	1	2	1	2.66667	1	21	1	1	216	2	1.92	2	7.12	2	19.99	1	150	2	5.28	2	0.16	1	3.33	2	1.35	2	195	2	2.47	2	1.71	2	144.44	2	3.38	2	48.35	2	481
T002012417	64	0	0	1	4	0	0	0	1	3	2	1	1	15.3333	0	27.1	2	1	225	2	0.296	2	6.23	2	15.48	1	134	2	7.51	2	0.13	1	6.09	2	0.97	2	223	2	6.28	1	4.29	1	229.9	1	3.34	2	48.75	2	1400.07
T002023332	65	1	0	0	4	0	0	0	1	3	2	1	0	26.6667	0	26.7	2	1	240	2	1.95	2	5.52	2	24.93	1	136	2	7.39	2	0.15	1	4.94	2	1.82	1	207	2	2.71	2	2.02	2	113.74	2	3.87	2	57	1	561.86
T002025685	62	0	1	1	4	0	0	0	1	3	2	1	1	10.2667	1	16.6	2	0	194	2	3.72	2	5.94	2	14.44	2	167	2	6.02	2	0.08	2	3.64	2	1.97	1	255	2	1.85	2	1.53	2	129.44	2	6.35	1	58.75	1	471.17
T002046211	58	0	1	1	4	0	0	0	1	3	2	1	0	25.0667	0	25.1	2	0	168	2	1.65	2	4.61	2	17.53	1	152	2	7.39	2	0.14	1	4.67	2	2.13	1	287	2	2.19	2	1.72	2	134.74	2	5.61	1	52.55	1	629.24
T002035667	77	0	0	0	4	0	0	0	0	3	2	1	0	24.8333	0	24.8	2	1	220	2	5.92	1	7.87	2	12.63	2	129	2	7.66	2	0.23	1	5.87	2	1.08	2	178	2	5.44	1	3.28	1	164.81	2	2.35	2	48.8	2	967.46
T002021433	60	0	1	1	4	0	0	1	1	3	2	1	0	25.6	0	25.6	2	0	176	2	2.24	2	17.09	2	8.81	2	114	1	12.26	1	0.29	1	7.79	2	2.84	1	166	2	2.74	2	1.74	2	58.45	2	2.41	2	55.4	1	455.33
T002023788	69	0	0	0	4	0	0	0	1	1	1	1	1	3.23333	1	11.2	1	0	165	2	2.48	2	6.46	2	12.68	2	126	2	6.24	2	0.02	2	5.25	2	0.59	2	179	2	8.9	1	5.3	1	303.39	1	1.59	2	48.15	2	1592.8
T002026312	69	1	0	0	3	0	0	0	0	3	2	1	1	9.13333	1	11.3	1	0	261	1	1.58	2	9.98	2	16.02	1	114	1	6.45	2	0.18	1	4.66	2	1.15	2	244	2	4.05	1	2.6	1	212.17	1	2.74	2	45.65	2	988.73
T001760894	69	0	1	1	4	0	0	0	1	3	2	1	0	51.5333	0	51.5	2	1	175	2	5.76	1	6.67	2	13.63	2	114	1	6.38	2	0.09	2	4.6	2	1.19	2	224	2	3.87	1	2.58	1	188.24	2	2.53	2	46.05	2	865.88
T001781890	53	0	1	0	4	0	0	0	1	1	1	1	0	37.0333	0	37	2	1	164	2	1.99	2	9.22	2	16.35	1	148	2	4.24	2	0.09	2	2.96	2	0.82	2	276	2	3.61	1	2.31	1	336.59	1	2.34	2	51	1	996.29
T001845361	64	0	1	1	4	0	0	0	1	3	2	1	1	4.86667	1	15.9	2	1	206	2	4.26	2	17.18	2	15.06	2	121	2	8.81	2	0.1	2	6.68	2	1.47	2	197	2	4.54	1	3.14	1	134.01	2	2.72	2	55.55	1	895.21
T001890033	58	0	1	0	4	0	0	0	0	3	2	1	1	12.6667	1	32.8	2	1	225	2	7.1	1	16.44	2	16.42	1	163	2	8.61	2	0.05	2	6.03	2	2.1	1	282	2	2.87	2	2.34	1	134.29	2	5	1	58	1	809.74
T001899960	50	0	1	1	4	0	0	0	1	3	2	1	0	25	0	25	2	1	165	2	1.35	2	1.89	2	15.73	1	97	1	9.46	2	0.12	1	7.48	2	1.27	2	411	1	5.89	1	3.78	1	323.62	1	2.31	2	45.85	2	2420.69
T001929246	63	0	1	1	4	0	0	0	1	1	1	2	1	3.06667	1	10.2	1	1	199	2	3.23	2	4.97	2	10.89	2	89	1	4.63	2	0	2	3.61	2	0.54	2	169	2	6.69	1	3.54	1	312.96	1	1.15	2	46.2	2	1129.8
T001981979	61	0	1	1	4	0	0	0	0	3	2	1	1	6.1	1	13.6	1	0	182	2	2.21	2	6.09	2	20.46	1	145	2	8.11	2	0.15	1	5.36	2	2	1	330	1	2.68	2	1.95	2	165	2	3.77	2	59.3	1	884.4
T001981543	69	0	0	0	4	0	0	1	1	3	2	1	1	4.4	1	7.5	1	0	318	1	170.2	1	1.49	2	20.62	1	124	2	7.58	2	0.28	1	5.78	2	1.14	2	225	2	5.07	1	3.21	1	197.37	1	3.17	2	48.5	2	1140.79
T002014408	71	1	0	0	4	0	0	0	1	4	1	1	1	12.8	0	26.1	2	0	212	2	0.785	2	5.01	2	15.73	1	135	2	6.72	2	0.13	1	4.15	2	1.99	1	372	1	2.09	2	1.61	2	186.93	2	4.85	1	58.35	1	775.78
T001985140	47	0	1	1	4	0	0	0	1	3	2	1	0	29.5667	0	29.6	2	1	165	2	2.33	2	17.23	2	19.22	1	149	2	8.98	2	0.13	1	5.81	2	2.51	1	308	1	2.31	2	1.83	2	122.71	2	5.02	1	56.95	1	712.94
T001985499	56	0	1	1	4	0	0	0	0	3	2	1	1	2.46667	0	20.6	1	1	139	2	2.02	2	16.35	2	13.07	2	158	2	6.04	2	0.11	1	3.67	2	1.81	1	280	2	2.03	2	1.55	2	154.7	2	4.21	2	55.65	1	567.73
T002041441	70	0	1	1	4	0	0	0	1	3	2	1	0	25.0333	0	25	2	1	209	2	3.83	2	19.46	2	13.64	2	138	2	20.4	1	1.42	1	16.28	1	1.76	1	322	1	9.25	1	3.95	1	182.95	2	2.07	2	42.1	2	2978.5
T002019064	61	0	1	1	4	0	0	0	1	3	2	1	0	27.1667	0	27.2	2	0	214	2	0.764	2	8.54	2	13.73	2	164	2	6.85	2	0.12	1	4.46	2	1.77	1	230	2	2.52	2	1.87	2	129.94	2	3.77	2	53.55	1	579.55
T001591403	70	0	1	1	4	1	0	0	1	3	2	1	0	43.1333	0	43.1	2	1	328	1	6.98	1	1.48	2	19.25	1	120	2	5.22	2	0.11	1	4.27	2	0.57	2	163	2	7.49	1	4.49	1	285.96	1	2.28	2	49.85	1	1221.07
T001635584	77	0	1	0	4	0	0	0	1	3	2	1	1	4.6	1	6.6	2	1	198	2	2.35	2	27.36	2	11.74	2	143	2	5.62	2	0.1	2	4.14	2	1.24	2	180	2	3.34	1	2.8	1	145.16	2	9.54	1	53.8	1	600.97
T001776877	64	1	0	0	4	0	0	0	1	3	2	1	0	31.9333	0	31.9	2	1	169	2	2.4	2	10.3	2	13.77	2	124	2	3.12	2	0.04	2	2.4	2	0.42	2	195	2	5.71	1	3.33	1	464.29	1	1.68	2	41.4	2	1114.29
T001786696	58	0	1	1	4	0	0	0	1	4	1	2	1	12.7	1	13.2	2	0	175	2	3.8	2	8.71	2	12.14	2	144	2	4.17	2	0.06	2	2.71	2	1.15	2	115	2	2.36	2	1.86	2	100	2	4.79	1	53.35	1	271
T001833446	58	0	0	1	4	1	0	0	1	4	1	2	1	5.7	1	6	1	0	1282	1	375.6	1	90.44	1	131.3	1	112	1	5.89	2	0.07	2	3.81	2	1.49	2	207	2	2.56	2	1.83	2	138.93	2	3.04	2	47.25	2	529.31
T001835300	64	0	1	1	4	0	0	0	1	4	1	2	1	1.7	1	5.5	1	0	136	2	2.58	2	46.33	1	6.57	2	83	1	3.39	2	0.15	1	1.67	2	1.16	2	200	2	1.44	2	0.97	2	172.41	2	3.22	2	34.4	2	287.93
T001861949	63	0	1	0	4	0	0	0	1	4	1	2	1	4.76667	1	6.8	1	1	147	2	6.73	1	334.9	1	15.5	1	106	1	4.79	2	0.04	2	3.46	2	0.93	2	145	2	3.72	1	2.6	1	155.91	2	2.74	2	53.25	1	539.46
T001876048	58	0	1	1	4	0	1	0	1	4	1	2	1	1.8	1	4.3	1	0	500	1	26.42	1	155.5	1	22.91	1	137	2	12.29	1	0.08	2	10.6	1	0.63	2	283	2	16.83	1	6.27	1	449.21	1	0.66	2	49.15	2	4761.59
T001913221	58	0	1	1	4	0	0	0	0	3	2	1	1	1.26667	1	11.5	1	0	161	2	3.88	2	17	2	9.62	2	137	2	6.52	2	0.06	2	3.58	2	2.55	1	246	2	1.4	2	1.22	2	96.47	2	8.79	1	54.55	1	345.36
T001925432	59	0	1	1	4	0	0	0	0	3	2	1	1	4.76667	1	16.9	1	0	139	2	1.37	2	1.73	2	12.41	2	146	2	6.69	2	0.05	2	5.47	2	0.77	2	307	1	7.1	1	4.48	1	398.7	1	2.03	2	41.75	2	2180.9
T001930802	61	0	1	1	4	0	0	0	0	3	2	1	1	6.5	1	7.8	2	0	187	2	2.76	2	5.29	2	13.9	2	161	2	5.81	2	0.07	2	3.31	2	2.1	1	234	2	1.58	2	1.32	2	111.43	2	7.24	1	51.7	1	368.83
T001924788	64	0	0	0	4	1	0	0	1	3	2	1	0	33.3333	0	33.3	2	0	207	2	3.12	2	13.31	2	14.89	2	128	2	4.82	2	0.07	2	3.25	2	1.21	2	175	2	2.69	2	2.07	1	144.63	2	4.48	1	50.15	1	470.04
T001970370	61	0	1	1	4	0	1	1	1	3	2	1	1	9.76667	0	29.5	2	1	146	2	15.79	1	0.613	2	12.22	2	134	2	6.22	2	0.11	1	3.88	2	1.64	2	204	2	2.37	2	1.66	2	124.39	2	2.93	2	51.4	1	482.63
T001960003	58	0	1	0	4	1	0	0	1	3	2	1	1	4.2	1	11.2	1	0	341	1	2.91	2	15.48	2	39.59	1	113	1	6.1	2	0.14	1	3.86	2	1.62	2	235	2	2.38	2	1.72	2	145.06	2	3.45	2	54.7	1	559.94
T001974604	70	0	1	0	4	0	0	0	1	4	1	1	1	5.1	1	27.1	2	1	181	2	3.4	2	13.25	2	10.31	2	132	2	6.83	2	0.09	2	5.14	2	0.86	2	160	2	5.98	1	3.04	1	186.05	2	1.21	2	47.5	2	956.28
T001997066	59	0	1	0	4	0	0	0	1	3	2	1	1	2.43333	1	11	1	1	164	2	1.56	2	11.72	2	11.71	2	146	2	6.19	2	0.1	2	4.42	2	1.34	2	224	2	3.3	1	2.5	1	167.16	2	4.47	1	49.1	2	738.87
T002011315	65	0	1	1	4	0	0	0	1	3	2	1	1	7.26667	1	17	1	1	210	2	4.39	2	11.57	2	17.98	1	134	2	5.2	2	0.18	1	2.76	2	1.46	2	312	1	1.89	2	1.13	2	213.7	1	1.9	2	45.8	2	589.81
T002026226	64	0	1	1	4	0	0	0	1	4	1	1	1	1.16667	0	25.8	1	1	162	2	1.68	2	6.2	2	13.31	2	114	1	8.92	2	0.06	2	6.91	2	1.56	2	265	2	4.43	1	3.44	1	169.87	2	4.22	2	48.2	2	1173.81
T001861958	63	1	0	0	4	1	0	0	1	4	1	2	1	2.8	1	9.5	1	1	197	2	3.93	2	14.59	2	10.69	2	122	2	6.51	2	0.08	2	4.4	2	1.66	2	128	2	2.65	2	2.09	1	77.11	2	4.49	1	53.3	1	339.28
T001865050	66	0	1	1	4	0	0	0	1	3	2	1	1	21.5	0	38.3	2	1	210	2	3.57	2	28.26	2	29.76	1	163	2	7.07	2	0.04	2	5.43	2	1.09	2	274	2	4.98	1	3.31	1	251.38	1	2.18	2	49.55	1	1364.97
T001895259	60	0	1	1	4	0	0	0	1	3	2	1	0	36.4667	0	36.5	2	1	183	2	1.64	2	13.36	2	14.45	2	145	2	5.4	2	0.24	1	3.46	2	1.26	2	237	2	2.75	2	1.78	2	188.1	2	3.07	2	49.7	1	650.81
T001932140	56	0	0	1	4	0	0	0	1	4	1	1	1	0.666667	1	14.5	1	1	280	1	2.09	2	6.01	2	25.33	1	118	1	7.12	2	0.08	2	3.83	2	2.71	1	233	2	1.41	2	1.16	2	85.98	2	5.77	1	54.35	1	329.3
T001924607	74	0	0	0	4	0	0	0	1	3	2	2	1	21.7333	1	23.8	1	1	210	2	3.91	2	10.91	2	16.07	1	143	2	4.51	2	0.04	2	3.7	2	0.62	2	201	2	5.97	1	4.57	1	324.19	1	4.43	1	46.6	2	1199.52
T001928515	56	0	1	1	4	1	0	1	1	3	2	1	1	5.13333	1	4.2	1	0	229	2	13.7	1	8.47	2	18.98	1	119	1	8.71	2	0.01	2	7.62	2	0.44	2	304	1	17.32	1	6.99	1	690.91	1	0.7	2	33.9	2	5264.73
T001971890	62	0	1	1	4	0	0	0	1	3	2	1	1	23.8667	0	29.7	2	1	172	2	1.68	2	15.88	2	21.97	1	124	2	9.61	2	0.09	2	7.7	2	0.82	2	532	1	9.39	1	4.03	1	648.78	1	0.88	2	45.6	2	4995.61
T001971272	58	0	1	1	4	0	0	0	0	3	2	1	0	29	0	29	2	1	163	2	2.29	2	15.47	2	13.75	2	137	2	6.75	2	0.02	2	2.1	2	3.76	1	330	1	0.56	2	0.45	2	87.77	2	4.42	1	62.5	1	184.31
T001968419	51	0	1	1	4	1	1	0	1	3	2	1	1	2.86667	1	3.9	1	0	359	1	3.88	2	23.58	2	61.64	1	134	2	12.19	1	0.03	2	9.76	1	1.19	2	420	1	8.2	1	4.02	1	352.94	1	1.02	2	45.55	2	3444.71
T001986338	70	0	1	1	4	0	0	0	1	3	2	1	1	15.5333	1	16.8	2	1	175	2	2.49	2	10.37	2	11.39	2	128	2	8.61	2	0.19	1	1.91	2	6.12	1	91	2	0.31	2	0.29	2	14.87	2	17	1	76.7	1	28.4
T002001187	60	0	1	1	4	0	0	1	1	3	2	1	1	12.7667	1	13.1	2	0	180	2	0.733	2	8.27	2	26.95	1	142	2	8.01	2	0.13	1	5.72	2	1.56	2	335	1	3.67	1	2.5	1	214.74	1	2.74	2	49.6	1	1228.33
T002019498	55	0	1	1	4	0	0	0	0	3	2	1	1	14.5667	1	17.6	2	0	147	2	6.33	1	32.03	2	15.84	1	165	2	7.23	2	0.19	1	4.05	2	2.36	1	250	2	1.72	2	1.27	2	105.93	2	4	2	57.7	1	429.03
T002043691	64	0	1	1	4	0	0	0	0	3	2	1	1	2	1	9.8	1	0	241	1	3.65	2	5.62	2	23.57	1	112	1	8.1	2	0.09	2	6.08	2	1.66	2	197	2	3.66	1	3.01	1	118.67	2	6.92	1	43.7	2	721.54
T002047727	67	1	0	0	4	0	0	0	1	3	2	1	0	22.9667	0	23	2	0	186	2	3.01	2	7.87	2	16.76	1	141	2	6.09	2	0.15	1	3.46	2	1.91	1	254	2	1.81	2	1.32	2	132.98	2	3.67	2	55.45	1	460.13
T002017163	68	0	1	1	4	0	0	0	1	4	1	2	1	4.73333	1	5.4	1	0	142	2	4.39	2	2.32	2	15.45	1	125	2	7.33	2	0.09	2	5.54	2	1.18	2	183	2	4.69	1	3.09	1	155.08	2	2.41	2	48.4	2	859.17
9591300	70	1	0	0	3	0	0	0	0	3	2	1	1	20.8333	1	21.9	2	1	190	2	5.19	1	1.44	2	17.31	1	126	2	5.7	2	0.07	2	3.15	2	2.1	1	275	2	1.5	2	1.24	2	130.95	2	6	1	56	1	412.5
T001471315	58	0	0	0	4	0	0	0	1	4	1	2	1	10	1	27.4	2	1	152	2	8.6	1	0.668	2	10.35	2	106	1	8.02	2	0.19	1	6.44	2	0.9	2	304	1	7.16	1	4.08	1	337.78	1	2.09	2	46.2	2	2175.29
T001480267	57	0	1	1	4	0	0	0	1	4	1	2	1	1.03333	1	2	1	0	276	1	3.45	2	6.82	2	25.17	1	134	2	7.15	2	0.16	1	6.22	2	0.5	2	104	2	12.44	1	6.69	1	208	1	2	2	38.1	2	1293.76
T001860689	56	1	0	0	4	0	0	0	1	4	1	2	1	2.36667	1	2.4	1	0	228	2	1.76	2	23.5	2	14.9	2	125	2	11.74	1	0.1	2	10.48	1	0.47	2	216	2	22.3	1	8.32	1	459.57	1	0.7	2	40.15	2	4816.34
T001918385	73	0	1	1	4	0	1	0	1	3	2	1	1	6.76667	1	11	1	0	195	2	1.89	2	9.68	2	27.63	1	134	2	10.54	1	0.08	2	7.83	2	2.09	1	321	1	3.75	1	2.89	1	153.59	2	4.1	2	52.45	1	1202.6
T001949387	71	1	0	0	4	0	0	0	1	3	2	1	1	10.7667	1	29.1	1	1	228	2	1.49	2	198	1	13.39	2	110	1	3.21	2	0.04	2	1.74	2	1.12	2	192	2	1.55	2	1.18	2	171.43	2	3.86	2	48	2	298.29
T001980215	62	0	1	1	4	0	0	0	0	3	2	1	0	29.8	0	29.8	2	0	176	2	3.16	2	3.38	2	14.59	2	128	2	6.4	2	0.06	2	3.79	2	2.19	1	250	2	1.73	2	1.45	2	114.16	2	6.44	1	52.25	1	432.65
T001957550	52	0	0	1	4	0	0	0	0	3	2	1	0	31.8333	0	31.8	2	0	153	2	2.11	2	12.04	2	16.63	1	139	2	6.21	2	0.13	1	3.97	2	1.74	1	230	2	2.28	2	1.77	2	132.18	2	4.83	1	53	1	524.77
T001986751	73	0	1	1	3	0	0	0	1	3	2	1	0	29.7333	0	29.7	2	1	153	2	1.27	2	90.65	1	13.98	2	131	2	6.3	2	0.13	1	3.92	2	1.9	1	276	2	2.06	2	1.65	2	145.26	2	6.13	1	50.9	1	569.43
T002010513	57	0	1	1	4	0	0	1	1	4	1	1	1	7.03333	1	10.7	1	0	193	2	5.68	1	0.845	2	12.3	2	140	2	5.38	2	0.13	1	3.54	2	1.21	2	109	2	2.93	2	1.92	2	90.08	2	2.63	2	49.25	2	318.89
T001990229	64	0	0	1	4	0	0	0	1	3	2	1	0	29.3333	0	29.3	2	1	204	2	0.949	2	5.2	2	15.04	2	137	2	9.75	2	0.32	1	7.44	2	1.37	2	267	2	5.43	1	3.22	1	194.89	1	2.32	2	48.65	2	1449.99
T002031943	62	0	0	1	4	0	0	0	1	3	2	1	1	3.76667	1	5.8	1	0	251	1	3.06	2	9.91	2	20.73	1	135	2	6.69	2	0.3	1	3.94	2	1.92	1	187	2	2.05	2	1.43	2	97.4	2	4	2	53.6	1	383.74
T002022707	63	0	1	1	4	0	0	0	1	3	2	1	0	26.6333	0	26.6	2	0	137	2	1.66	2	6.3	2	13.37	2	132	2	15.17	1	0.16	1	13.07	1	1.06	2	499	1	12.33	1	6.22	1	470.75	1	1.26	2	44.3	2	6152.76
T002068837	77	0	1	0	4	0	1	0	1	4	1	2	1	3.83333	0	11	1	0	285	1	7.51	1	13.6	2	41.15	1	138	2	4.47	2	0.13	1	3.03	2	1.07	2	118	2	2.83	2	2.1	1	110.28	2	5.1	1	45.25	2	334.15
T002125033	57	0	1	1	4	1	0	0	1	4	1	1	1	7.53333	1	8.6	1	0	515	1	24.39	1	15.26	2	15.98	1	99	1	7.6	2	0.04	2	5.79	2	1.06	2	239	2	5.46	1	3.2	1	225.47	1	1.54	2	44.1	2	1305.48
T002065135	51	0	1	1	4	0	0	0	0	3	2	1	0	22.3333	0	22.3	2	0	168	2	2.93	2	1.53	2	12.44	2	147	2	6.99	2	0.11	1	4.7	2	1.55	2	222	2	3.032	1	2.05	1	143.23	2	2.5	2	50.75	1	673.16
T002239546	55	0	1	0	4	0	1	0	1	1	1	1	1	1	1	5	1	0	174	2	1.99	2	7.41	2	12.77	2	118	1	6.31	2	0.11	1	4.7	2	1.05	2	330	1	4.48	1	2.92	1	314.29	1	2.5	2	46.65	2	1477.14
T001823144	61	0	1	0	4	0	0	0	1	4	1	1	1	4.56667	1	12.9	1	0	131	2	0.98	2	1.24	2	8.74	2	99	1	3.62	2	0.02	2	2.37	2	0.91	2	144	2	2.6	2	1.9	2	158.24	2	2.94	2	44.55	2	375.03
T002080236	76	0	0	0	4	1	0	0	1	3	2	1	0	20.6667	0	20.7	2	0	229	2	1.6	2	12.02	2	14.41	2	144	2	5.97	2	0.08	2	3.31	2	2.27	1	208	2	1.46	2	1.24	2	91.63	2	7.57	1	54.55	1	303.3
T002047632	60	0	0	1	4	0	0	1	1	3	2	1	1	12.2333	1	14.2	1	0	174	2	6.3	1	18.23	2	10.65	2	132	2	5.73	2	0.11	1	3.79	2	1.46	2	219	2	2.6	2	1.95	2	150	2	4.42	1	50.5	1	568.5
T002135788	53	1	0	0	4	1	0	0	1	3	2	1	0	14.4	0	14.4	2	0	228	2	2.71	2	33.05	2	24.91	1	122	2	8.34	2	0.06	2	6.63	2	1.22	2	306	1	5.43	1	3.88	1	250.82	1	2.98	2	55.6	1	1662.93
T001989407	66	0	1	1	4	0	1	0	1	3	2	1	1	1.6	1	12.6	1	0	181	2	1.7	2	4.6	2	25.49	1	124	2	3.23	2	0.1	2	2.245	2	0.66	2	181	2	3.4	1	2.28	1	274.24	1	3.14	2	48.2	2	615.67
T002023395	62	1	0	0	4	0	0	0	1	4	1	1	1	2.63333	1	7.6	1	0	203	2	2.65	2	15	2	13.21	2	124	2	4.16	2	0.01	2	2.9	2	1.02	2	215	2	2.84	2	2.3	1	210.78	1	4.64	1	46.9	2	611.27
T002187268	52	0	1	1	4	0	0	0	1	3	2	1	1	9.93333	0	10.8	2	0	152	2	1.43	2	3.87	2	12.35	2	132	2	13.89	1	0.08	2	13.13	1	0.55	2	102	2	23.87	1	17.28	1	185.45	2	6.11	1	48.55	2	2435.02
T002199574	59	0	1	1	4	0	0	0	1	3	2	1	1	6.9	0	8.9	2	0	140	2	1.63	2	4.06	2	13.1	2	109	1	13.77	1	0.15	1	11.64	1	1.26	2	494	1	9.24	1	5.46	1	392.06	1	1.83	2	45.6	2	4563.62
T002079126	60	1	0	0	3	0	0	0	0	3	2	1	1	5.46667	0	20	2	1	156	2	3.11	2	11.42	2	13.6	2	136	2	5.85	2	0.08	2	3.48	2	1.95	1	242	2	1.78	2	1.47	2	124.1	2	5.91	1	53.85	1	431.88
T002163986	60	0	1	1	4	0	1	0	1	3	2	1	0	11.4	0	11.4	2	0	212	2	2.84	2	10.3	2	10.71	2	154	2	8.3	2	0.1	2	5.45	2	2.35	1	240	2	2.32	2	1.91	2	102.13	2	6.53	1	57.55	1	556.6
T002179646	60	1	0	0	4	0	0	0	1	3	2	1	1	8.46667	0	11.8	2	1	175	2	1.5	2	0.6	2	11.51	2	110	1	5.19	2	0.15	1	3.36	2	1.43	2	217	2	2.35	2	1.84	2	151.75	2	6.22	1	49.95	1	509.87
T002047587	65	0	1	1	4	1	0	0	1	1	1	2	0	19.6	0	19.6	2	1	145	2	2.22	2	9.04	2	13.53	2	115	1	6.19	2	0.03	2	3.99	2	1.84	1	154	2	2.17	2	1.81	2	83.7	2	6.34	1	48.5	2	333.95
T001813233	69	0	1	0	4	1	0	0	1	3	2	2	1	5	1	8.4	1	0	139	2	4.51	2	10.07	2	12.27	2	128	2	4.4	2	0.03	2	3.04	2	0.98	2	142	2	3.1	1	2.24	1	144.9	2	2.88	2	43	2	440.49
T001991370	60	0	1	0	4	0	0	0	1	4	1	2	1	15.1	1	29.7	2	0	328	1	3.1	2	7.15	2	31.25	1	165	2	5.36	2	0.04	2	4.02	2	0.86	2	209	2	4.67	1	3	1	243.02	1	2.05	2	45.6	2	976.95
T001803742	73	0	1	1	4	0	0	0	1	3	2	1	1	2.73333	1	15.4	1	0	168	2	2.23	2	21.39	2	12.82	2	130	2	4.37	2	0.14	1	2.28	2	1.66	2	145	2	1.37	2	1.09	2	87.35	2	6.15	1	48.3	2	199.16
T002074277	75	0	1	0	4	0	0	0	1	3	2	1	1	0.4	0	17.1	1	0	199	2	9.65	1	28.16	2	12.45	2	94	1	2.47	2	0.04	2	1.07	2	1.06	2	172	2	1.01	2	0.76	2	162.26	2	3.79	2	43.1	2	173.62
T002170445	63	0	0	0	4	0	0	0	1	3	2	2	0	5.13333	0	5.1	1	0	159	2	1.5	2	16.56	2	6.79	2	84	1	9.15	2	0.08	2	7.75	2	0.81	2	285	2	9.57	1	5.54	1	351.85	1	1.62	2	38.55	2	2726.85
T002230078	75	0	1	1	4	0	0	0	1	3	2	1	0	7.1	0	7.1	2	1	196	2	1.47	2	3.07	2	16.91	1	119	1	4.8	2	0.04	2	3.49	2	0.8	2	157	2	4.36	1	2.66	1	196.25	1	1.78	2	45.5	2	684.91
T002070415	59	0	1	1	4	0	0	0	1	3	2	1	0	5.26667	0	5.3	1	1	180	2	2.44	2	2.24	2	10.93	2	139	2	5.03	2	0.24	1	3.34	2	1.36	2	191	2	2.46	2	1.98	2	140.44	2	19.43	1	52.3	1	469.07
T002189391	73	0	1	0	4	0	0	0	1	3	2	1	0	10.3667	0	10.4	2	0	335	1	3.96	2	12.57	2	22.78	1	136	2	2.54	2	0.05	2	1.68	2	0.66	2	120	2	2.55	2	1.95	2	181.82	2	5.08	1	46.7	2	305.45
T002010967	73	0	1	1	4	0	1	0	1	3	2	1	1	20.7	0	20.9	2	1	234	2	4.05	2	9.53	2	13.13	2	135	2	7.8	2	0.63	1	4.21	2	2.31	1	207	2	1.82	2	1.17	2	89.61	2	3.73	2	59.85	1	377.26
T002206267	52	0	1	1	4	1	0	0	1	3	2	1	1	5.96667	0	9.2	2	0	152	2	5.82	1	9.56	2	9.88	2	126	2	8.68	2	0.13	1	7.26	2	0.89	2	231	2	8.16	1	5.11	1	259.55	1	2.34	2	44.95	2	1884.34
T001914563	53	0	1	1	4	1	0	1	1	4	1	1	1	1.36667	1	4.8	1	0	1399	1	1.05	2	7.7	2	347.8	1	121	2	4.24	2	0.02	2	3.19	2	0.67	2	127	2	4.76	1	3.04	1	189.55	1	1.91	2	35.15	2	604.67
T001961087	70	1	0	0	4	1	0	0	1	3	2	1	0	31.1333	0	31.1	2	1	177	2	1.88	2	55.46	1	23.02	1	91	1	19.27	1	0.33	1	16.47	1	1.12	2	480	1	14.71	1	5.88	1	428.57	1	0.87	2	45.6	2	7058.57
T002246347	61	0	1	1	4	0	0	0	1	3	2	1	1	6.06667	0	7.4	2	0	193	2	2.41	2	90.26	1	17.42	1	124	2	9.01	2	0.14	1	6.45	2	1.8	1	423	1	3.58	1	2.52	1	235	1	3.1	2	54.5	1	1515.75
T002160905	63	0	1	1	3	0	0	0	0	3	2	1	0	2.5	0	2.5	2	0	164	2	2.57	2	12.4	2	15.3	1	131	2	4.42	2	0.08	2	3.09	2	0.93	2	154	2	3.32	1	2.32	1	165.59	2	3	2	49.65	1	511.68
T001830814	54	0	1	1	4	0	1	0	1	3	2	1	1	4.5	1	10.8	1	0	218	2	14.77	1	141.2	1	13.21	2	136	2	3.69	2	0.05	2	1.73	2	1.67	2	206	2	1.04	2	0.88	2	123.35	2	7.59	1	50.55	1	213.4
T001517654	54	0	0	0	4	0	0	0	1	3	2	2	1	4.76667	0	18.3	1	0	182	2	2.55	2	9.67	2	10.69	2	130	2	6.68	2	0.11	1	4.07	2	2.03	1	207	2	2	2	1.56	2	101.97	2	4.95	1	55.65	1	415.02
T001451022	69	0	1	1	4	0	0	0	0	3	2	1	0	8.36667	0	8.4	2	0	145	2	3.18	2	0.6	2	15.05	2	133	2	6.76	2	0.08	2	5.03	2	0.94	2	392	1	5.35	1	2.91	1	417.02	1	1.38	2	45.6	2	2097.62
T002059472	59	0	1	0	4	0	0	0	0	3	2	1	0	20.3	0	20.3	2	0	234	2	2.79	2	23.78	2	9.29	2	121	2	4.85	2	0.06	2	2.78	2	1.64	2	191	2	1.7	2	1.34	2	116.46	2	4.69	1	52.4	1	323.77
T002061702	53	0	1	1	4	0	0	0	1	1	1	1	1	5.73333	1	10.1	1	0	132	2	1.46	2	9.27	2	10.63	2	119	1	2.8	2	0.1	2	1.62	2	0.23	2	95	2	7.04	1	1.37	2	413.04	1	0.27	2	41.85	2	669.13
T002174058	70	0	0	0	4	0	1	0	1	3	2	2	1	4.06667	1	21.7	1	0	284	1	2.11	2	10.21	2	15.06	2	147	2	6.83	2	0.07	2	4.1	2	1.76	1	264	2	2.33	2	1.5	2	150	2	2	2	50.1	1	615
T001952333	65	0	1	1	4	0	0	1	1	1	1	1	1	7.23333	0	24.2	1	1	164	2	2.35	2	3.78	2	11.99	2	123	2	4.6	2	0.23	1	1.86	2	2.1	1	175	2	0.89	2	0.68	2	83.33	2	5.38	1	53.3	1	155
T001993851	74	0	1	0	4	0	0	0	1	3	2	1	1	2.6	1	3.9	1	0	262	1	10.1	1	16.87	2	22.64	1	138	2	4.39	2	0.03	2	3.1	2	1.01	2	260	2	3.07	1	2.4	1	257.43	1	4.21	2	46.15	2	798.02
T002057734	62	0	1	1	3	0	0	0	1	1	1	1	1	12.5667	0	22.6	2	1	199	2	13.68	1	4.21	2	17.82	1	144	2	5.14	2	0.11	1	3.56	2	1	2	195	2	3.56	1	2.25	1	195	1	2.38	2	44.5	2	694.2
T001913232	74	0	1	1	3	0	0	0	0	1	1	1	0	9.73333	0	9.7	2	0	186	2	1.38	2	4.58	2	17.96	1	125	2	6.92	2	0.03	2	6.24	2	0.5	2	208	2	12.48	1	9.18	1	416	1	3.57	2	37.4	2	2595.84
T001762368	77	0	1	0	4	0	1	0	1	3	2	1	1	2.23333	0	6.1	1	0	221	2	5.86	1	39.66	1	13.5	2	138	2	6.33	2	0.32	1	3.75	2	1.75	1	231	2	2.14	2	1.45	2	132	2	3.65	2	52.85	1	495
T002057324	64	0	1	1	4	0	1	0	1	3	2	1	1	5.16667	0	23.7	2	0	143	2	1.76	2	11.57	2	15.92	1	103	1	3.59	2	0.04	2	1.92	2	1.09	2	156	2	1.76	2	1.15	2	143.12	2	2.06	2	43.45	2	274.79
T001252091	59	0	1	1	4	0	1	0	1	1	1	2	0	26.3333	0	26.3	2	0	213	2	3.14	2	16.83	2	15.75	1	97	1	7.2	2	0.24	1	5.16	2	1.23	2	336	1	4.2	1	2.53	1	273.17	1	2.46	2	51.45	1	1409.56
T001790841	61	0	1	1	3	0	0	0	0	3	2	1	0	45.6667	0	45.7	2	1	153	2	4.29	2	0.06	2	9.51	2	140	2	5.64	2	0.7	1	2.79	2	1.88	1	173	2	1.48	2	0.98	2	92.02	2	7.52	1	55.8	1	256.74
T001898744	55	0	1	1	4	0	1	0	1	4	1	1	1	6.4	1	18.2	1	0	175	2	1.11	2	13.34	2	12.54	2	139	2	7.02	2	0.03	2	5.18	2	1.51	2	159	2	3.43	1	2.82	1	105.3	2	5.21	1	52.35	1	545.44
T002154046	59	0	1	1	4	1	1	1	1	3	2	1	1	4.06667	0	13	2	0	296	1	3.83	2	7.58	2	24.18	1	73	1	5.74	2	0.08	2	3.84	2	0.55	2	468	1	6.98	1	2.02	1	850.91	1	0.14	2	46.55	2	3267.49
T001191766	61	0	1	1	4	0	1	0	1	3	2	1	1	5.83333	0	8.1	1	0	240	2	2.65	2	10.19	2	18.86	1	128	2	6.88	2	0.21	1	4.82	2	1.34	2	266	2	3.6	1	2.34	1	198.51	1	2.79	2	49.2	2	956.81
T001981482	73	0	1	0	4	1	1	0	1	3	2	1	1	8.33333	0	28.8	2	0	506	1	7.76	1	12.33	2	9.24	2	124	2	5.61	2	0.1	2	2.86	2	2.3	1	204	2	1.24	2	1.04	2	88.7	2	7.19	1	56.9	1	253.67
T002029390	61	0	1	0	4	0	0	0	1	3	2	1	1	1.33333	1	6.7	1	0	170	2	1.4	2	7.38	2	10.37	2	125	2	4.64	2	0.05	2	2.95	2	1.39	2	223	2	2.12	2	1.75	2	160.43	2	5.79	1	41.75	2	473.27
T001444143	58	0	1	1	4	0	1	0	1	3	2	1	1	5.06667	0	34.4	2	0	196	2	3.42	2	6.6	2	12.51	2	128	2	4.74	2	0.11	1	3.37	2	1.13	2	139	2	2.98	2	2.46	1	123.01	2	10.27	1	54.15	1	414.54
T002117785	64	0	1	0	4	0	1	1	1	3	2	1	1	15.5333	0	17.5	2	0	151	2	2.71	2	2	2	12.5	2	139	2	6.04	2	0.15	1	3.14	2	2.44	1	175	2	1.29	2	1.08	2	71.72	2	8.41	1	56.3	1	225.2
T002127324	51	0	1	1	4	0	1	0	1	1	1	1	1	4.16667	0	9.8	1	0	125	2	0.87	2	8.32	2	14.64	2	117	1	4.57	2	0.15	1	2.13	2	1.85	1	208	2	1.15	2	0.87	2	112.43	2	4.51	1	50.65	1	239.48
T002142681	52	0	1	0	4	0	0	0	1	3	2	1	0	13.8333	0	13.8	2	1	137	2	2.63	2	3.98	2	11.9	2	87	1	9.91	2	0.15	1	6.99	2	1.75	1	361	1	3.99	1	2.39	1	206.29	1	1.8	2	44.15	2	1441.94
T002242928	62	0	1	1	4	0	1	0	1	3	2	1	1	2.8	0	7.7	2	0	208	2	1.17	2	7.46	2	12.41	2	117	1	4.13	2	0.14	1	2.11	2	1.56	2	203	2	1.35	2	1.04	2	130.13	2	5.38	1	51.6	1	274.57
T001634568	62	0	1	1	4	0	0	0	1	1	1	2	0	5.3	0	5.3	1	0	172	2	5.94	1	25.1	2	17.67	1	119	1	5.63	2	0.13	1	3.75	2	1.38	2	353	1	2.72	2	1.99	2	255.8	1	4.31	2	49	2	959.24
T002076268	54	0	1	0	4	0	0	0	1	3	2	1	1	12.8333	0	12.9	1	1	241	1	3.15	2	7.38	2	8.09	2	142	2	6.7	2	0.25	1	3.86	2	2.05	1	212	2	1.88	2	1.36	2	103.41	2	4.02	2	53.95	1	399.18
T001994274	57	0	1	1	3	0	0	0	0	3	2	1	1	11.1333	0	29.4	2	0	180	2	3.75	2	15.51	2	13.28	2	130	2	5.44	2	0.07	2	3.48	2	1.42	2	277	2	2.45	2	1.78	2	195.07	1	3.64	2	50.8	1	678.85
T002221793	49	0	1	1	4	1	0	1	1	3	2	1	1	1.4	0	8.4	1	0	124	2	1.65	2	0.83	2	8.1	2	116	1	10.94	1	0.22	1	8.86	1	1.21	2	139	2	7.32	1	4.26	1	114.88	2	1.92	2	51.25	1	1017.8
T002145589	54	0	1	1	4	0	0	0	0	3	2	1	1	3.66667	1	8.4	1	1	626	1	2.28	2	6.23	2	11.39	2	138	2	7.01	2	0.04	2	4.7	2	1.52	2	298	2	3.09	1	2.03	1	196.05	1	2.08	2	46.7	2	921.45
T002206454	54	0	1	1	4	0	0	0	0	3	2	1	0	9.96667	0	10	2	0	154	2	2.13	2	6.85	2	13.55	2	165	2	7.77	2	0.12	1	4.85	2	2.4	1	245	2	2.02	2	1.66	2	102.08	2	6.67	1	54.6	1	495.1
T002269354	55	0	1	1	4	0	0	0	0	3	2	1	0	5.46667	0	5.5	1	0	176	2	5.78	1	6.86	2	18.3	1	164	2	9.57	2	0.11	1	7.08	2	1.64	2	241	2	4.32	1	2.84	1	146.95	2	2.38	2	54.8	1	1040.41
T002152435	62	0	0	0	4	0	0	0	0	3	2	2	1	7.13333	1	8.5	2	0	315	1	4.61	2	26.9	2	22.24	1	126	2	7.65	2	0.06	2	5.79	2	1.37	2	187	2	4.23	1	3.11	1	136.5	2	3.51	2	49.05	2	790.31
T002240515	48	0	1	1	4	0	0	0	0	3	2	1	0	7.16667	0	7.2	2	0	180	2	2.8	2	0.658	2	11.59	2	165	2	7.21	2	0.22	1	4.37	2	1.96	1	216	2	2.23	2	1.54	2	110.2	2	3.11	2	53	1	481.59
T002078981	53	0	1	1	4	0	1	1	1	3	2	1	1	8.46667	1	10.5	1	1	194	2	9.49	1	16.75	2	8.9	2	144	2	5.54	2	0.03	2	3.76	2	1.37	2	180	2	2.74	2	2.11	1	131.39	2	3.91	2	42.55	2	494.01
T001995050	56	1	0	0	4	0	0	0	0	4	1	2	1	12.5	1	12.5	1	0	192	2	1.19	2	15.86	2	19.03	1	102	1	3.87	2	0.12	1	2.62	2	0.81	2	275	2	3.23	1	2.1	1	339.51	1	2.79	2	34.95	2	889.51
T002138183	64	0	0	0	4	1	0	0	1	3	2	2	1	8.56667	1	10.6	2	0	145	2	1.25	2	0.608	2	39.01	1	100	1	6.14	2	0.01	2	5.01	2	0.76	2	187	2	6.59	1	4.43	1	246.05	1	2.17	2	40.2	2	1232.72
T002205017	66	0	1	1	4	0	0	0	1	3	2	1	0	7.83333	0	7.8	2	0	149	2	21.57	1	6.19	2	13.85	2	143	2	8.56	2	0.11	1	6.26	2	1.64	2	310	1	3.82	1	2.72	1	189.02	1	3.09	2	51.2	1	1183.29
T002236408	60	0	1	0	4	0	0	0	0	3	2	1	0	7.7	0	7.7	2	0	148	2	4.93	2	3.66	2	12.26	2	170	2	7.6	2	0.13	1	5.17	2	2.02	1	229	2	2.56	2	2.13	1	113.37	2	7.48	1	54	1	586.1
T002113210	69	0	0	0	4	0	0	0	0	3	2	1	1	12.1667	1	12.2	2	0	201	2	1.59	2	12.05	2	14.63	2	156	2	9.39	2	0.19	1	7.01	2	1.55	2	295	2	4.52	1	2.95	1	190.32	1	2.5	2	53.65	1	1334.16
T002085994	66	0	1	0	4	1	0	0	0	3	2	1	1	1.63333	1	16.5	1	0	249	1	6.68	1	20.36	2	10.46	2	152	2	7.38	2	0.11	1	5.79	2	1	2	169	2	5.79	1	3.64	1	169	2	2.33	2	46.4	2	978.51
T002150182	52	0	1	1	4	0	0	0	1	3	2	1	0	13.2667	0	13.3	2	0	145	2	2.67	2	11.1	2	15.04	2	136	2	14.18	1	0.25	1	10.45	1	2.24	1	312	1	4.67	1	2.8	1	139.29	2	1.85	2	51.3	1	1455.54
T001958292	70	0	1	1	4	0	0	0	1	3	2	2	1	1.2	1	15.5	1	0	288	1	8.82	1	10.4	2	15.78	1	99	1	4.4	2	0.13	1	3.54	2	0.57	2	99	2	6.21	1	4.12	1	173.68	2	4.07	2	46.05	2	614.84
T002159736	74	1	0	0	4	0	1	0	1	3	2	1	1	3.23333	1	10.7	1	0	279	1	2.72	2	9.78	2	39.11	1	80	1	3.77	2	0.01	2	2.24	2	1.06	2	32	2	2.11	2	1.46	2	30.19	2	2.41	2	43.1	2	67.62
T002135894	46	0	1	1	4	0	0	0	0	3	2	1	1	8.3	1	15.5	2	0	167	2	4.97	2	0.6	2	13.41	2	158	2	11.65	1	0.13	1	7.96	2	2.8	1	334	1	2.84	2	2.16	1	119.29	2	3.89	2	57.6	1	949.51
T002170609	64	0	1	1	4	1	0	0	1	3	2	1	1	8.03333	1	8	1	0	192	2	3.69	2	22.71	2	9.93	2	100	1	3.51	2	0.01	2	2.5	2	0.71	2	170	2	3.52	1	2.48	1	239.44	1	2.54	2	46.65	2	598.59
T002170008	65	0	0	0	3	0	0	0	1	3	2	1	0	12.1333	0	12.1	2	0	157	2	6.05	1	24.42	2	12.62	2	150	2	8.06	2	0.21	1	4.62	2	2.8	1	234	2	1.65	2	1.34	2	83.57	2	7.18	1	58.4	1	386.1
T002156941	81	1	1	1	3	0	0	0	0	3	2	1	0	12.6	0	12.6	2	1	163	2	2.48	2	13.49	2	5.64	2	125	2	6.91	2	0.29	1	4.3	2	1.9	1	148	2	2.26	2	1.65	2	77.89	2	5.14	1	50.8	1	334.95
T002064679	62	0	1	1	4	1	0	0	1	4	1	2	1	0.566667	1	5	1	0	2142	1	2.7	2	10.85	2	27.42	1	128	2	6.14	2	0.14	1	3.02	2	2.5	1	135	2	1.21	2	0.97	2	54	2	5.43	1	52.7	1	163.08
T002149338	70	0	1	1	4	0	1	0	1	3	2	1	0	12.4333	0	12.4	2	0	172	2	3.32	2	8.25	2	15.16	2	136	2	5.46	2	0.04	2	4.29	2	0.83	2	160	2	5.17	1	3.67	1	192.77	1	2.86	2	48.65	2	826.99
T002151096	63	0	0	0	4	1	0	0	1	3	2	1	0	13	0	13	2	0	208	2	1.41	2	6.7	2	15.97	1	127	2	10.82	1	0.02	2	9.48	1	1.02	2	328	1	9.29	1	7.07	1	321.57	1	3.78	2	46.2	2	3048.47
T002220733	65	0	1	1	4	1	1	0	1	3	2	1	1	7.63333	0	8	1	0	214	2	5.98	1	28.79	2	17.07	1	166	2	9.52	2	0.19	1	6.92	2	1.92	1	224	2	3.6	1	2.66	1	116.67	2	4.36	1	56.6	1	807.33
T002071190	49	0	1	1	4	0	0	0	0	3	2	1	1	10	1	12.4	2	1	165	2	26.64	1	140.9	1	17.71	1	148	2	5.01	2	0.14	1	2.71	2	1.62	2	228	2	1.67	2	1.18	2	140.74	2	3.31	2	50.7	1	381.41
T002258933	67	0	1	1	4	0	1	0	0	3	2	1	0	7	0	7	2	0	181	2	1.46	2	8.31	2	25.4	1	135	2	10.42	1	0.1	2	8.63	1	1.04	2	284	2	8.3	1	4.82	1	273.08	1	1.68	2	45.3	2	2356.65
T002210451	63	0	1	0	4	0	0	0	1	3	2	1	1	1.43333	1	3.6	1	0	240	2	2.46	2	16.11	2	21.94	1	135	2	8.84	2	0.31	1	5.78	2	2.19	1	282	2	2.64	2	1.89	2	128.77	2	4.29	2	52.45	1	744.27
T002145977	72	0	1	1	4	0	1	0	1	3	2	2	1	4.06667	1	14.8	1	0	224	2	4.82	2	12.98	2	29.55	1	130	2	7.72	2	0.03	2	6.29	2	0.96	2	176	2	6.55	1	4.4	1	183.33	2	2.29	2	48.1	2	1153.17
T002237283	58	0	1	1	4	0	0	0	1	3	2	1	0	6.93333	0	6.9	2	0	156	2	6.47	1	7.85	2	9.99	2	118	1	5.02	2	0.08	2	3.08	2	1.05	2	254	2	2.93	2	1.59	2	241.9	1	1.36	2	47.95	2	745.07
T002182669	65	0	1	0	4	0	0	0	0	3	2	2	0	11.3	0	11.3	2	0	196	2	1.95	2	16.07	2	19.29	1	111	1	5.91	2	0.14	1	2.91	2	2.46	1	287	2	1.18	2	0.97	2	116.67	2	6.47	1	52.8	1	339.5
T002196256	66	0	1	0	4	0	0	0	0	3	2	1	0	10.0667	0	10.1	2	0	211	2	4.52	2	23.65	2	13.6	2	120	2	7.77	2	0.07	2	5.07	2	2.17	1	302	1	2.34	2	1.88	2	139.17	2	5.17	1	55.35	1	705.59
T001999456	66	1	1	0	3	0	0	0	0	3	2	1	0	28.4	0	28.4	2	0	183	2	3.26	2	11.55	2	11.49	2	119	1	8.64	2	0.25	1	5.41	2	2.54	1	347	1	2.13	2	1.67	2	136.61	2	6.2	1	57.3	1	739.08
T001562894	75	1	0	0	4	0	0	0	0	3	2	1	1	5.76667	1	7.8	1	0	218	2	3.73	2	11.14	2	8.61	2	108	1	5.29	2	0.1	2	3.23	2	1.26	2	311	1	2.56	2	1.57	2	246.83	1	1.91	2	43.5	2	797.25
T002090469	64	0	1	1	3	0	0	0	1	3	2	1	1	16.9667	0	17.2	2	0	190	2	2.76	2	11.32	2	9.15	2	156	2	5.93	2	0.02	2	4.47	2	1.01	2	340	1	4.43	1	3.06	1	336.63	1	2.59	2	50.25	1	1504.75
T002087974	51	0	1	0	4	0	1	0	1	3	2	1	1	11.1333	1	26.8	2	0	214	2	5.54	1	25.38	2	15.63	1	140	2	3.7	2	0.06	2	2.79	2	0.51	2	157	2	5.47	1	3.07	1	307.84	1	1.76	2	43.95	2	858.88
T002269758	69	0	1	1	4	0	1	0	1	3	2	1	0	7.2	0	7.2	2	0	147	2	1.41	2	14	2	10.2	2	101	1	1.57	2	0.03	2	0.65	2	0.61	2	126	2	1.07	2	0.71	2	206.56	1	2.18	2	42.65	2	134.26
T002183225	46	0	0	0	4	1	0	0	1	3	2	1	1	2.36667	1	4.4	1	1	2381	1	1.54	2	32055	1	41.13	1	140	2	8.99	2	0.19	1	6.11	2	1.75	1	340	1	3.49	1	2.12	1	194.29	1	2.11	2	53.85	1	1187.09
T002233772	64	0	1	0	4	0	1	0	1	3	2	1	0	7.53333	0	7.5	2	0	201	2	7.46	1	20.62	2	18.54	1	145	2	10.86	1	0.25	1	7.09	2	2.75	1	224	2	2.58	2	1.88	2	81.45	2	3.82	2	64.65	1	577.51
T002133991	56	0	1	1	4	0	1	1	1	3	2	1	1	3.93333	1	9.7	1	0	158	2	87.19	1	46.53	1	11.37	2	104	1	2.37	2	0	2	2.02	2	0.27	2	100	2	7.48	1	5.77	1	370.37	1	3.86	2	52.15	1	748.15
T001916324	63	0	0	1	4	0	0	0	1	3	2	1	1	3.8	0	17.3	1	0	295	1	2.82	2	10.82	2	13.94	2	129	2	4.75	2	0.03	2	3.03	2	1.4	2	192	2	2.16	2	1.76	2	137.14	2	5.19	1	52	1	415.54
T002232184	59	0	1	1	4	0	0	0	1	3	2	1	0	7.13333	0	7.1	2	0	231	2	1.46	2	2.38	2	16.65	1	149	2	7.93	2	0.57	1	4.88	2	1.99	1	346	1	2.45	2	1.6	2	173.87	2	5.1	1	52.55	1	848.48
T002226230	67	0	1	1	4	0	1	0	1	3	2	1	1	1.7	1	6.3	1	0	159	2	10.59	1	28.59	2	14.45	2	99	1	10.01	1	0	2	8.79	1	0.61	2	318	1	14.41	1	7.2	1	521.31	1	1.02	2	44.05	2	4582.33
T002091246	70	0	1	1	4	1	0	0	1	3	2	2	1	13.8333	1	15.9	1	0	344	1	2.8	2	15.46	2	14.31	2	139	2	11.01	1	0.03	2	9.32	1	1.02	2	243	2	9.14	1	5.51	1	238.24	1	1.65	2	49.3	2	2220.35
T002166428	70	0	1	1	4	1	0	0	1	3	2	1	1	1.76667	0	12.9	1	0	172	2	2.19	2	14.71	2	15.66	1	159	2	7.15	2	0.08	2	4.54	2	1.96	1	137	2	2.32	2	1.74	2	69.9	2	3.56	2	51.7	1	317.34
T002041888	72	0	1	1	4	0	0	0	0	1	1	1	0	5.83333	0	5.8	2	1	189	2	5.01	1	18.11	2	13.2	2	116	1	5.48	2	0.44	1	3.74	2	0.88	2	225	2	4.25	1	2.15	1	255.68	1	2.32	2	43.1	2	956.25
T002220350	56	0	1	1	4	0	0	0	0	3	2	1	0	8.7	0	8.7	2	0	172	2	2.08	2	19.1	2	22.7	1	143	2	7.01	2	0.16	1	4.3	2	2.2	1	193	2	1.95	2	1.59	2	87.73	2	6.47	1	53.5	1	377.23
T002088891	60	0	1	1	4	1	1	0	1	3	2	1	1	1.56667	1	12.9	1	0	552	1	3.05	2	9.59	2	51.1	1	141	2	6.29	2	0.14	1	4.32	2	1.43	2	281	2	3.02	2	2.19	1	196.5	1	3.86	2	48.35	2	848.9
T002171161	49	0	1	1	4	0	0	0	1	3	2	1	1	10	0	22.6	2	0	192	2	1.71	2	7.89	2	8.25	2	134	2	12.64	1	0.01	2	10.2	1	1.71	1	266	2	5.96	1	4.18	1	155.56	2	2.41	2	54.05	1	1586.67
T002231302	66	0	1	1	4	0	0	0	1	3	2	1	0	8.26667	0	8.3	2	0	183	2	3.75	2	107.3	1	12.2	2	134	2	8.12	2	0.05	2	5.06	2	2.45	1	252	2	2.07	2	1.65	2	102.86	2	4.45	1	56.25	1	520.46
T002185338	57	0	1	1	4	0	1	0	1	3	2	1	1	6.5	1	8.5	2	1	281	1	179.43	1	3.87	2	15.88	1	136	2	4.7	2	0.17	1	2.41	2	1.98	1	182	2	1.22	2	1.05	2	91.92	2	16.5	1	53.6	1	221.53
T002195617	64	0	1	1	4	0	0	0	1	3	2	1	0	10.5	0	10.5	2	0	159	2	1.04	2	0.6	2	11.7	2	135	2	6.12	2	0.05	2	4.41	2	1.36	2	219	2	3.24	1	2.58	1	161.03	2	4.86	1	51.7	1	710.14
T002122865	63	0	1	1	4	0	0	1	1	3	2	1	1	5.6	1	8.3	1	0	220	2	3.2	2	19.76	2	16.88	1	151	2	6.72	2	0.2	1	4.77	2	1.22	2	220	2	3.91	1	2.45	1	180.33	2	2.44	2	50.6	1	860.16
T002171797	58	0	1	0	4	1	1	0	1	3	2	1	1	4.9	1	8.5	1	0	182	2	2.04	2	7.13	2	18.25	1	133	2	2.74	2	0.06	2	1.19	2	1.43	2	90	2	0.83	2	0.77	2	62.94	2	28.6	1	54.25	1	74.9
T001939124	48	0	1	0	4	0	0	0	0	3	2	1	1	10.4667	1	12.5	1	0	187	2	1.38	2	2.23	2	13.85	2	154	2	6.79	2	0.17	1	3.84	2	2.3	1	327	1	1.67	2	1.3	2	142.17	2	5.11	1	54.9	1	545.95
T001898160	76	0	1	0	4	1	0	0	1	3	2	1	1	7.33333	1	15.8	2	0	320	1	2.12	2	7.03	2	11.87	2	150	2	7.71	2	0.1	2	6.18	2	1.03	2	184	2	6	1	4.04	1	178.64	2	2.78	2	49.15	2	1104
T002161577	68	0	1	1	4	0	0	0	1	3	2	1	1	1.16667	0	9.9	1	0	169	2	1.13	2	3.3	2	17.96	1	137	2	11.93	1	0.1	2	8.22	1	3.02	1	334	1	2.72	2	2.22	1	110.6	2	5.49	1	58	1	909.1
T002186666	64	0	0	0	4	0	0	0	1	3	2	1	1	5.56667	0	12.8	1	0	160	2	2.04	2	22.72	2	9.02	2	152	2	8.11	2	0.03	2	5.41	2	2.04	1	192	2	2.65	2	2	2	94.12	2	3.71	2	51.2	1	509.18
T002215971	59	0	1	1	4	0	0	1	1	3	2	1	1	7	0	8.5	2	0	186	2	1.69	2	14.95	2	17.3	1	152	2	14	1	0.14	1	11.79	1	1.19	2	297	2	9.91	1	5.33	1	249.58	1	1.4	2	53.35	1	2942.55
T002170959	56	0	1	1	4	0	0	0	0	3	2	1	1	10.2333	0	10.9	2	0	135	2	38.96	1	100.7	1	14.15	2	117	1	8.09	2	0.08	2	5.68	2	1.61	2	429	1	3.53	1	2.36	1	266.46	1	2.3	2	48.55	2	1513.49
T002088288	53	0	1	1	4	0	0	1	1	4	1	1	1	2.06667	1	5.1	1	0	153	2	4	2	7.59	2	7.5	2	112	1	8.99	2	0.05	2	6.59	2	1.6	2	339	1	4.12	1	2.75	1	211.88	1	2.22	2	48.7	2	1396.26
T002059964	58	0	1	1	4	1	0	0	1	3	2	1	1	18.4667	0	24.1	2	0	515	1	3.1	2	12.32	2	46.16	1	152	2	10.1	1	0.25	1	7.47	2	1.92	1	230	2	3.89	1	2.84	1	119.79	2	4.47	1	54.1	1	894.84
T002067622	52	0	1	1	4	0	0	0	1	3	2	1	0	9.86667	0	9.9	2	0	243	1	5.06	1	0.6	2	14.1	2	182	2	7.09	2	0.1	2	5.54	2	1.05	2	163	2	5.28	1	3.57	1	155.24	2	2.69	2	51.95	1	860.02
T002252373	65	0	1	0	4	0	0	0	1	3	2	1	0	5.53333	0	5.5	2	0	136	2	1.81	2	12.6	2	12.7	2	141	2	11.13	1	0.19	1	8.62	1	1.8	1	223	2	4.79	1	3.43	1	123.89	2	3.75	2	54.6	1	1067.92
T002183526	53	0	1	0	4	0	0	0	1	3	2	1	1	9.26667	1	11.3	2	0	177	2	1.16	2	8.64	2	12.04	2	134	2	9.05	2	0.36	1	6.94	2	0.96	2	183	2	7.23	1	3.29	1	190.63	1	1.28	2	49.3	2	1322.94
T002147568	54	0	1	1	4	0	0	0	1	3	2	1	0	5.86667	0	5.9	2	0	175	2	2.21	2	18.6	2	13.2	2	117	1	5.83	2	0.08	2	4.26	2	1.03	2	210	2	4.14	1	2.71	1	203.88	1	2.4	2	48.75	2	868.54
T002014353	69	0	0	1	4	0	0	0	1	3	2	1	0	24.7	0	24.7	2	1	193	2	11.7	1	3.86	2	17.48	1	87	1	5.96	2	0.42	1	3.09	2	1.96	1	316	1	1.58	2	1.08	2	161.22	2	4.36	1	50	1	498.18
T002199532	69	0	1	1	4	0	1	0	1	3	2	1	1	5	1	7	1	0	157	2	1.41	2	16.16	2	11.62	2	135	2	7.42	2	0.16	1	4.41	2	2.14	1	324	1	2.06	2	1.47	2	151.4	2	3.34	2	51.5	1	667.68
T002111389	67	0	1	0	4	1	0	0	1	3	2	1	1	7.5	0	18.1	2	0	450	1	2.4	2	113.9	1	25.13	1	148	2	9.1	2	0.13	1	5.42	2	2.74	1	274	2	1.98	2	1.47	2	100	2	3.61	2	58.6	1	542
T002141260	75	0	1	1	4	0	0	0	0	3	2	1	1	7.9	1	9.9	1	0	187	2	3.91	2	3.55	2	15.17	2	114	1	9.34	2	0.11	1	7.25	2	1.18	2	322	1	6.14	1	3.47	1	272.88	1	1.53	2	43.3	2	1978.39
T002081705	60	0	1	1	4	1	0	1	1	3	2	1	1	5.43333	1	12.5	1	0	293	1	1.14	2	7.15	2	42.44	1	160	2	6.44	2	0.03	2	4.42	2	1.65	2	276	2	2.68	2	2.19	1	167.27	2	5.16	1	54.75	1	739.35
T002002463	67	0	1	1	4	0	0	0	0	3	2	1	1	25.0333	1	27	2	1	192	2	7.41	1	11.82	2	15.01	2	142	2	5.39	2	0.1	2	3.26	2	1.56	2	236	2	2.09	2	1.53	2	151.28	2	3.47	2	51.5	1	493.18
T002079352	53	0	0	0	4	0	0	0	1	3	2	1	1	4.43333	1	6.9	2	0	179	2	2.18	2	5.01	2	16.56	1	152	2	6.93	2	0.2	1	4.43	2	1.77	1	348	1	2.5	2	1.77	2	196.61	1	3.61	2	50.95	1	870.98
T002244260	74	0	1	1	4	0	0	1	1	3	2	1	1	5.3	0	6.4	1	0	156	2	3.61	2	13.2	2	12.7	2	151	2	9.5	2	0.25	1	7.98	2	0.63	2	294	2	12.67	1	5.25	1	466.67	1	1.07	2	37.35	2	3724
T001931144	50	0	1	0	3	1	1	0	1	3	2	1	1	25.1667	1	27.2	2	0	149	2	5.09	1	9.57	2	13.28	2	148	2	6.77	2	0.08	2	4.59	2	1.57	2	272	2	2.92	2	2.11	1	173.25	2	3.08	2	54.65	1	795.21
T002222004	64	0	1	1	4	0	0	0	1	3	2	1	1	1.76667	1	3.8	1	0	226	2	10.39	1	0.6	2	14.41	2	143	2	8.28	2	0.09	2	5.87	2	1.66	2	229	2	3.54	1	2.44	1	137.95	2	2.55	2	53.8	1	809.78
T002276874	52	0	1	1	4	0	0	0	1	3	2	1	1	5.56667	0	6.3	1	0	505	1	19.07	1	78.8	1	72.2	1	142	2	5.17	2	0.23	1	3	2	1.57	2	270	2	1.91	2	1.38	2	171.97	2	4.62	1	55.65	1	515.92
T002278543	68	0	1	1	4	0	0	0	1	3	2	1	0	4.76667	0	4.8	2	0	175	2	3.4	2	42.4	1	20.2	1	173	2	5.25	2	0.18	1	3.3	2	1.48	2	157	2	2.23	2	1.69	2	106.08	2	5.69	1	52	1	350.07
T002085400	54	0	1	0	4	0	0	0	1	3	2	1	0	19.7667	0	19.8	2	0	213	2	1.67	2	7.68	2	10.92	2	145	2	6.53	2	0.18	1	4.28	2	1.71	1	317	1	2.5	2	1.9	2	185.38	2	5.18	1	48.85	2	793.43
T002232942	76	0	1	1	4	1	0	0	1	3	2	1	0	7.46667	0	7.5	2	0	1173	1	1.51	2	47.49	1	58.79	1	145	2	6.31	2	0.04	2	4.28	2	1.57	2	232	2	2.73	2	2.11	1	147.77	2	3.93	2	53.65	1	632.46
T002245587	59	0	1	0	4	0	1	0	1	3	2	1	0	6.73333	0	6.7	2	0	178	2	1.82	2	11	2	16.16	1	183	2	7.72	2	0.2	1	4.42	2	2.51	1	271	2	1.76	2	1.34	2	107.97	2	4.48	1	57.45	1	477.22
[truncated: 4 more columns]

## Sheet: Baseline survival outcomes(OS)
group		mOS	lower	upper	HR（exp(coef)）	exp(-coef)	HR lower	HR upper	P value
follow-up		29.7	28.13	31.27
Line_of_therapy
	First-line	21.3	17	27.1
	≥Second-line	10.2	8.6	13.4	2.29363	0.435989	1.81136	2.9043	5.47949e-12
Treatment
	mono-ICIs	10.2	7.9	14
	ICIs + Chemotherapy	24.6	17.6	28.5	0.390568	2.56037	0.297684	0.512436	1.15933e-11
	ICIs + Targeted therapy	10.25	8.4	13.2	1.06896	0.935486	0.76054	1.50246	0.701004
CPS
	<10	15.5	13.4	17.6
	≥10	16.9	15.1	23.4	0.9368	1.067	0.7354	1.194	0.598
Risk group (training cohort)
	Low	32.8	27.4	48.7
	Moderate	17.5	14.1	23.8	2.0273	0.4933	1.459	2.817	2.55e-05
	High	8.7	7.6	10.4	5.1289	0.195	3.737	7.038	< 2E-16

## Sheet: cox model
Variable	Reference	coef	exp(coef)	se(coef)	z	Pr(>|z|)	exp_conf_low	exp_conf_high
Staging	3(III)	1.28485	3.61414	0.416955	3.08152	0.00205949	1.59622	8.1831
Bone_metastasis	0(No)	0.291594	1.33856	0.181168	1.60953	0.107501	0.938485	1.90919
Line_of_therapy	1(first line)	0.439512	1.55195	0.151039	2.90992	0.00361521	1.15428	2.08662
Treatment	1(mono-ICIs)	-0.598019	0.5499	0.15206	-3.93278	8.39704e-05	0.408178	0.740828
LDH	0(≤240)	0.367917	1.44472	0.142638	2.57938	0.00989789	1.09237	1.91072
CEA	0(≤5)	0.30251	1.35325	0.141659	2.13547	0.0327223	1.02517	1.78632
CA199	0(≤37)	0.560333	1.75126	0.205456	2.72727	0.00638608	1.17075	2.61959
ALC	0(≤1.7)	-0.316081	0.729001	0.179537	-1.76053	0.0783178	0.51275	1.03645
PNI	0(≤49.5)	-0.317874	0.727695	0.135124	-2.35247	0.0186494	0.558382	0.948346
SII	0(≤589.61)	0.490408	1.63298	0.143276	3.42281	0.000619774	1.23317	2.16241
C-index: 0.72478044323942
95% CI: 0.6938835-0.7556774

## Sheet: bootstrap
1000 resample results		C-index		AUC(1-, 2-, 3-year)
Bootstrap_Replicate	Bootstrap_C_Index	Statistic	Value	Year	Mean_AUC	Lower_CI	Upper_CI
1	0.720118	Original C-index	0.72478	1-Year	0.827702	0.752755	0.890614
2	0.737817	Uncorrected C-index	0.72775	2-Year	0.756377	0.675867	0.824944
3	0.736843	Uncorrected C-index Lower Bound	0.726744	3-Year	0.770926	0.668396	0.856305
4	0.745535	Uncorrected C-index Upper Bound	0.728756
5	0.704018	Bias-corrected C-index	0.721811
6	0.73668	Lower Bound	0.68765
7	0.741603	Upper Bound	0.751174
8	0.716633
9	0.731373
10	0.720498
11	0.721001
12	0.718521
13	0.730479
14	0.736771
15	0.724371
16	0.726867
17	0.712756
18	0.699296
19	0.739822
20	0.737273
21	0.712372
22	0.702843
23	0.730358
24	0.747735
25	0.749525
26	0.715982
27	0.727176
28	0.727021
29	0.734404
30	0.75527
31	0.709211
32	0.722717
33	0.715811
34	0.685578
35	0.710516
36	0.727075
37	0.743123
38	0.721871
39	0.742247
40	0.713384
41	0.710162
42	0.7292
43	0.728091
44	0.713682
45	0.732222
46	0.753486
47	0.725966
48	0.746122
49	0.743863
50	0.747262
51	0.731105
52	0.757348
53	0.706829
54	0.73075
55	0.751135
56	0.732038
57	0.704713
58	0.695329
59	0.730115
60	0.698409
61	0.734898
62	0.728531
63	0.713605
64	0.7203
65	0.722942
66	0.751501
67	0.714057
68	0.735941
69	0.731776
70	0.718559
71	0.723753
72	0.701004
73	0.718374
74	0.727144
75	0.735663
76	0.718619
77	0.718962
78	0.723613
79	0.72421
80	0.763632
81	0.696546
82	0.711282
83	0.72372
84	0.70077
85	0.726846
86	0.731318
87	0.744294
88	0.764654
89	0.724949
90	0.740721
91	0.75378
92	0.739896
93	0.679793
94	0.739209
95	0.751646
96	0.73408
97	0.725927
98	0.702216
99	0.693446
100	0.727068
101	0.712113
102	0.730461
103	0.72445
104	0.760628
105	0.73975
106	0.729611
107	0.727376
108	0.724091
109	0.711267
110	0.745628
111	0.696324
112	0.726043
113	0.711508
114	0.724178
115	0.751544
116	0.721268
117	0.679726
118	0.686635
119	0.756391
120	0.745465
121	0.710583
122	0.706676
123	0.73064
124	0.758695
125	0.725173
126	0.746835
127	0.696043
128	0.754173
129	0.747557
130	0.71213
131	0.706954
132	0.723335
133	0.753338
134	0.718752
135	0.722464
136	0.722872
137	0.719497
138	0.731472
139	0.732047
140	0.700897
141	0.724368
142	0.753439
143	0.734813
144	0.708199
145	0.716489
146	0.712034
147	0.735125
148	0.719824
149	0.700923
150	0.704167
151	0.739786
152	0.727509
153	0.728443
154	0.730267
155	0.730774
156	0.735779
157	0.715627
158	0.741545
159	0.714882
160	0.716292
161	0.729834
162	0.732709
163	0.723864
164	0.731129
165	0.72454
166	0.736517
167	0.734201
168	0.695886
169	0.727947
170	0.744979
171	0.725734
172	0.749387
173	0.747389
174	0.73783
175	0.694921
176	0.731282
177	0.727651
178	0.731363
179	0.737556
180	0.743791
181	0.710517
182	0.740175
183	0.75857
184	0.727139
185	0.72493
186	0.70943
187	0.720759
188	0.735576
189	0.724916
190	0.744451
191	0.745136
192	0.755946
193	0.730329
194	0.711877
195	0.731576
196	0.727254
197	0.72692
198	0.73411
199	0.724494
200	0.715431
201	0.704885
202	0.718135
203	0.70519
204	0.713183
205	0.740451
206	0.748545
207	0.703196
208	0.713376
209	0.711145
210	0.740754
211	0.72559
212	0.727048
213	0.737618
214	0.742231
215	0.701341
216	0.715011
217	0.717049
218	0.716731
219	0.718439
220	0.713509
221	0.72761
222	0.744297
223	0.733769
224	0.755196
225	0.738846
226	0.710956
227	0.700658
228	0.729669
229	0.720716
230	0.759289
231	0.737181
232	0.743954
233	0.706575
234	0.705461
235	0.726977
236	0.734272
237	0.744741
238	0.731521
239	0.724886
240	0.727427
241	0.738425
242	0.72659
243	0.715436
244	0.678471
245	0.733902
246	0.734613
247	0.711539
248	0.743884
249	0.715148
250	0.70146
251	0.700607
252	0.720208
253	0.742381
254	0.732456
255	0.699733
256	0.700261
257	0.710347
258	0.714115
259	0.741323
260	0.721799
261	0.731364
262	0.7248
263	0.720879
264	0.737899
265	0.713376
266	0.724599
267	0.736048
268	0.712493
269	0.749501
270	0.704618
271	0.717971
272	0.691904
273	0.73983
274	0.736119
275	0.716546
276	0.771456
277	0.739889
278	0.730764
279	0.742389
280	0.731305
281	0.731043
282	0.720959
283	0.745689
284	0.702728
285	0.714267
286	0.71743
287	0.72938
288	0.690642
289	0.734654
290	0.742691
291	0.730411
292	0.712405
293	0.754851
294	0.731843
295	0.757612
296	0.692029
297	0.726908
298	0.731183
299	0.718523
300	0.723117
301	0.7099
302	0.744038
303	0.715105
304	0.713882
305	0.730379
306	0.722338
307	0.75117
308	0.73213
309	0.703605
310	0.716957
311	0.716309
312	0.748592
313	0.74203
314	0.728276
315	0.716624
316	0.727062
317	0.735655
318	0.717647
319	0.703317
320	0.698326
321	0.723207
322	0.724116
323	0.716559
324	0.713109
325	0.721382
326	0.715689
327	0.712803
328	0.738777
329	0.749848
330	0.698618
331	0.735233
332	0.737577
333	0.733668
334	0.742572
335	0.74381
336	0.735949
337	0.734654
338	0.696829
339	0.732044
340	0.713658
341	0.735351
342	0.708466
343	0.732275
344	0.727825
345	0.7163
346	0.718086
347	0.725803
348	0.736024
349	0.747935
350	0.748844
351	0.753083
352	0.740227
353	0.751245
354	0.726336
355	0.720563
356	0.714455
357	0.721677
358	0.718182
359	0.704831
360	0.708094
361	0.761234
362	0.71573
363	0.737542
364	0.722131
365	0.731962
366	0.706518
367	0.70119
368	0.736325
369	0.723433
370	0.710674
371	0.742633
372	0.689214
373	0.736618
374	0.7139
375	0.725857
376	0.724927
377	0.726691
378	0.738418
379	0.736264
380	0.700215
381	0.729228
382	0.726786
383	0.764169
384	0.730285
385	0.73283
386	0.72621
387	0.721908
388	0.766657
389	0.729039
390	0.705525
391	0.718264
392	0.722085
393	0.719406
394	0.730625
395	0.749394
396	0.728163
397	0.713906
398	0.729495
399	0.731168
400	0.731098
401	0.735899
402	0.75384
403	0.732381
404	0.708791
405	0.730971
406	0.704128
407	0.739222
408	0.726015
409	0.73472
410	0.727078
411	0.707217
412	0.734124
413	0.697364
414	0.698815
415	0.701145
416	0.712673
417	0.728413
418	0.746016
419	0.72721
420	0.720963
421	0.722705
422	0.750484
423	0.731443
424	0.729157
425	0.73072
426	0.741495
427	0.729031
428	0.716657
429	0.747774
430	0.731064
431	0.706159
432	0.707199
433	0.745754
434	0.732206
435	0.720166
436	0.717832
437	0.717106
438	0.756239
439	0.722393
440	0.725605
441	0.707548
442	0.710382
443	0.702865
444	0.714275
445	0.707081
446	0.711269
447	0.746974
448	0.748917
449	0.714121
450	0.74664
451	0.731399
452	0.721891
453	0.744447
454	0.724108
455	0.712549
456	0.715832
457	0.749898
458	0.726607
459	0.732926
460	0.737147
461	0.725874
462	0.730724
463	0.69426
464	0.747238
465	0.730174
466	0.735302
467	0.711239
468	0.755082
469	0.730763
470	0.723151
471	0.732306
472	0.740546
473	0.751201
474	0.728248
475	0.727318
476	0.74507
477	0.720869
478	0.72689
479	0.716702
480	0.727004
481	0.731433
482	0.71605
483	0.747683
484	0.71696
485	0.744398
486	0.746406
487	0.723545
488	0.743554
489	0.725785
490	0.723683
491	0.739742
492	0.730681
493	0.748936
494	0.746648
495	0.737098
496	0.707375
497	0.745403
498	0.737869
499	0.734059
500	0.704256
501	0.734324
502	0.74451
503	0.70975
504	0.720376
505	0.723623
506	0.714204
507	0.707058
508	0.737035
509	0.744726
510	0.709167
511	0.707786
512	0.733659
513	0.743952
514	0.726836
515	0.745928
516	0.734808
517	0.722702
518	0.754452
519	0.740096
520	0.730472
521	0.742904
522	0.752436
523	0.714206
524	0.744513
525	0.728102
526	0.738556
527	0.740228
528	0.734802
529	0.735244
530	0.733476
531	0.723738
532	0.713891
533	0.730521
534	0.739273
535	0.729637
536	0.750502
537	0.749274
538	0.723304
539	0.708138
540	0.723878
541	0.711756
542	0.738851
543	0.744299
544	0.721016
545	0.731911
546	0.73443
547	0.702454
548	0.734309
549	0.734718
550	0.730491
551	0.699668
552	0.696138
553	0.719354
554	0.753402
555	0.709577
556	0.741689
557	0.716993
558	0.734759
559	0.698546
560	0.748771
561	0.729823
562	0.747922
563	0.730414
564	0.730732
565	0.709676
566	0.732602
567	0.733535
568	0.702941
569	0.7204
570	0.723469
571	0.738161
572	0.71522
573	0.731943
574	0.724437
575	0.73741
576	0.734578
577	0.758669
578	0.707058
579	0.732577
580	0.720378
581	0.722261
582	0.750794
583	0.737413
584	0.734892
585	0.744045
586	0.741079
587	0.696434
588	0.728659
589	0.729606
590	0.731488
591	0.725418
592	0.722814
593	0.735442
594	0.758445
595	0.724718
596	0.714645
597	0.742275
598	0.713678
599	0.712461
600	0.73575
601	0.716554
602	0.706972
603	0.727701
604	0.748075
605	0.742122
606	0.753377
607	0.724709
608	0.744374
609	0.722645
610	0.69232
611	0.723011
612	0.693748
613	0.74019
614	0.727856
615	0.708059
616	0.748428
617	0.727457
618	0.721178
619	0.705485
620	0.723901
621	0.724047
622	0.738067
623	0.736986
624	0.726543
625	0.723423
626	0.733007
627	0.736732
628	0.740599
629	0.735408
630	0.73014
631	0.719466
632	0.742517
633	0.757771
634	0.726872
635	0.718147
636	0.695788
637	0.737566
638	0.711292
639	0.708917
640	0.711551
641	0.736743
642	0.72448
643	0.715039
644	0.730578
645	0.743058
646	0.707344
647	0.713633
648	0.74664
649	0.722822
650	0.718847
651	0.750916
652	0.76034
653	0.7107
654	0.727195
655	0.730239
656	0.738237
657	0.730475
658	0.736246
659	0.740288
660	0.704076
661	0.719273
662	0.760879
663	0.73685
664	0.708771
665	0.72326
666	0.725492
667	0.721217
668	0.717859
669	0.722436
670	0.709392
671	0.731536
672	0.745964
673	0.74278
674	0.734027
675	0.73695
676	0.744878
677	0.751958
678	0.692925
679	0.743846
680	0.73448
681	0.732355
682	0.736662
683	0.719632
684	0.737493
685	0.726356
686	0.703894
687	0.711335
688	0.731215
689	0.741134
690	0.738304
691	0.697579
692	0.717921
693	0.74786
694	0.734294
695	0.738296
696	0.710699
697	0.767533
698	0.735892
699	0.73082
700	0.726133
701	0.716118
702	0.705184
703	0.714383
704	0.730265
705	0.738496
706	0.72811
707	0.720288
708	0.709068
709	0.750463
710	0.735894
711	0.723632
712	0.718345
713	0.713789
714	0.731017
715	0.722354
716	0.715768
717	0.716756
718	0.737947
719	0.769235
720	0.705006
721	0.72859
722	0.707681
723	0.733977
724	0.743258
725	0.75403
726	0.73534
727	0.744502
728	0.726849
729	0.742361
730	0.729889
731	0.756357
732	0.718081
733	0.717454
734	0.734159
735	0.733559
736	0.726041
737	0.74874
738	0.726472
739	0.747995
740	0.729915
741	0.725935
742	0.759818
743	0.725646
744	0.718932
745	0.729835
746	0.729045
747	0.721288
748	0.716959
749	0.706869
750	0.727859
751	0.735137
752	0.737486
753	0.691304
754	0.756979
755	0.763962
756	0.728596
757	0.737424
758	0.714311
759	0.725985
760	0.745598
761	0.724492
762	0.720055
763	0.731039
764	0.746715
765	0.720512
766	0.692401
767	0.729093
768	0.72127
769	0.750345
770	0.740681
771	0.708301
772	0.716781
773	0.732729
774	0.730192
775	0.733909
776	0.723972
777	0.739914
778	0.764978
779	0.734298
780	0.726948
781	0.719672
782	0.700399
783	0.718539
784	0.73657
785	0.710886
786	0.75109
787	0.690794
788	0.72089
789	0.738856
790	0.719421
791	0.724097
792	0.741452
793	0.728915
794	0.734953
795	0.74255
796	0.711288
797	0.723851
798	0.740017
799	0.741933
800	0.771795
801	0.70113
802	0.730614
803	0.728235
804	0.734236
805	0.725022
806	0.721249
807	0.729425
808	0.720726
809	0.768657
810	0.753686
811	0.736642
812	0.716573
813	0.751044
814	0.712039
815	0.737242
816	0.747417
817	0.735401
818	0.739199
819	0.754754
820	0.725056
821	0.74268
822	0.763612
823	0.7167
824	0.73289
825	0.73626
826	0.731946
827	0.707159
828	0.716713
829	0.710329
830	0.687841
831	0.739731
832	0.752862
833	0.709858
834	0.694591
835	0.710916
836	0.726647
837	0.721633
838	0.722906
839	0.720719
840	0.753552
841	0.728687
842	0.763253
843	0.730451
844	0.733209
845	0.732129
846	0.74293
847	0.729843
848	0.735315
849	0.714488
850	0.745372
851	0.74168
852	0.73865
853	0.730522
854	0.730421
855	0.698294
856	0.733225
857	0.743578
858	0.72061
859	0.727659
860	0.703506
861	0.723095
862	0.739929
863	0.743526
864	0.724447
865	0.724057
866	0.737242
867	0.733065
868	0.734429
869	0.704389
870	0.72315
871	0.734641
872	0.714139
873	0.717735
874	0.722198
875	0.735564
876	0.732449
877	0.737976
878	0.768722
879	0.749597
880	0.723381
881	0.716438
882	0.708336
883	0.740803
884	0.706176
885	0.754596
886	0.727907
887	0.751124
888	0.73477
889	0.744628
890	0.727892
891	0.735635
892	0.71897
893	0.746019
894	0.739268
895	0.730415
896	0.745544
897	0.759235
898	0.737597
899	0.72781
900	0.74097
901	0.715258
902	0.74673
903	0.690726
904	0.725684
905	0.704788
906	0.734209
907	0.747843
908	0.748342
909	0.730609
910	0.735852
911	0.730628
912	0.732482
913	0.719762
914	0.732446
915	0.717834
916	0.739846
917	0.715583
918	0.728726
919	0.733502
920	0.724061
921	0.757974
922	0.701358
923	0.688626
924	0.730117
925	0.711504
926	0.720254
927	0.692718
928	0.727106
929	0.741614
930	0.723553
931	0.764354
932	0.73947
933	0.749725
934	0.730794
935	0.740632
936	0.725472
937	0.726623
938	0.726709
939	0.731146
940	0.751188
941	0.719332
942	0.721075
943	0.73089
944	0.760191
945	0.749328
946	0.719799
947	0.710997
948	0.743341
949	0.759148
950	0.752147
951	0.687731
952	0.71789
953	0.731115
954	0.722548
955	0.711838
956	0.74304
957	0.702429
958	0.713563
959	0.737865
960	0.742982
961	0.737855
962	0.754964
963	0.700588
964	0.727313
965	0.725665
966	0.701712
967	0.720352
968	0.726998
969	0.71014
970	0.727139
971	0.690201
972	0.747223
973	0.699319
974	0.735886
975	0.733532
976	0.727912
977	0.689769
978	0.691293
979	0.753687
980	0.757492
981	0.672326
982	0.718674
983	0.752694
984	0.737064
985	0.711162
986	0.740505
987	0.694837
988	0.743754
989	0.723374
990	0.716422
991	0.734194
992	0.731773
993	0.722328
994	0.730381
995	0.747748
996	0.72746
997	0.699625
998	0.719546
999	0.748438
1000	0.724461

## Sheet: Risk stratification
id	Predict_Score(Rsik score)	Score_Group_Three	Tertiles of risk score
T001997815	-1.21516	Low	0	-2.49171
T001943395	0.190296	Moderate	0.333333	-0.40776
T001559851	0.946693	High	0.666667	0.440981
T001504421	0.62884	High	1	2.17752
T001481367	1.24922	High
T001535851	0.62884	High
T001424207	0.62884	High
T001548022	0.507206	High
T001402329	1.31461	High
T001486884	0.809738	High
T001482402	-0.17762	Moderate
T001519657	0.946693	High
T001249500	1.23829	High
T001507917	0.189353	Moderate
T001537628	1.18922	High
T001597184	0.138449	Moderate
T001287402	0.680686	High
T001425900	0.190296	Moderate
T001504173	0.348638	Moderate
T001508895	1.29929	High
T001317685	1.22297	High
T001445607	0.946693	High
T001445513	0.946693	High
T001268046	0.0168158	Moderate
T001436244	0.946693	High
T001483104	2.02963	High
T001328193	0.946693	High
T001419407	0.946693	High
T001348153	1.31461	High
T001507155	0.946693	High
T001348256	0.62884	High
T001311639	1.06758	High
T001221138	0.456303	High
T001371888	1.24922	High
T001282979	1.10133	High
T001347354	0.456303	High
T001398811	0.312771	Moderate
T001379435	0.946693	High
T001353344	0.783481	High
T001428481	1.23829	High
T001171476	0.946693	High
T001396255	0.824218	High
T001423885	1.18922	High
T001475255	1.24922	High
T001372391	1.23829	High
T001480690	0.946693	High
T001450110	0.62884	High
T001459391	0.7479	High
T001088182	0.920437	High
T001466484	0.62884	High
T001488520	0.62884	High
T001524748	1.31461	High
T001574012	1.54359	High
T001284218	0.456303	High
T001527123	1.24922	High
T001693903	1.24922	High
T001534352	1.60621	High
T001484714	1.22297	High
T001746270	0.138449	Moderate
T001658372	-0.17762	Moderate
T001575479	0.996755	High
T001545364	1.29929	High
T001508725	1.28835	High
T001593431	1.68713	High
T001688330	-0.301038	Moderate
T001570008	1.31461	High
T001700587	1.54082	High
T001452655	1.29929	High
T001282690	0.946693	High
T001594796	0.440981	Moderate
T001196794	0.685288	High
T001605578	0.996755	High
T001617721	0.824218	High
T001749034	0.456303	High
T001688793	0.507206	High
T001759790	0.996755	High
T001702762	0.138449	Moderate
T001746039	0.931371	High
T001787962	1.29929	High
T001630604	0.190296	Moderate
T001739040	0.138449	Moderate
T001674962	1.61714	High
T001787430	1.05226	High
T001484947	0.577192	High
T001665731	1.55713	High
T001584425	0.0307844	Moderate
T001597395	0.716553	High
T001537071	-0.927912	Low
T001588814	0.507206	High
T001659114	0.503279	High
T001617545	0.0168158	Moderate
T001616111	-0.596562	Low
T001623629	0.716553	High
T001635913	1.31068	High
T001554006	0.348638	Moderate
T001731027	0.507206	High
T001739337	-0.408703	Low
T001783039	-0.40776	Low
T001785567	-1.3674	Low
T001798237	-0.117105	Moderate
T001781829	0.983218	High
T001736283	1.36927	High
T001803298	-0.0908492	Moderate
T001811981	-0.0908492	Moderate
T001806996	-2.49171	Low
T001651673	1.11372	High
T001597767	-1.3674	Low
T008205760	-0.927912	Low
T001595191	1.24922	High
T001719868	0.138449	Moderate
T001358277	0.312771	Moderate
T001027456	0.946693	High
T001687070	-0.345178	Moderate
T001721984	-1.21516	Low
T001407328	0.138449	Moderate
T001642358	-0.42224	Low
T001553742	-0.899093	Low
T001618827	-1.21516	Low
T001665708	0.211682	Moderate
T001638805	-0.724772	Low
T001662919	-0.0908492	Moderate
T001500247	-0.408703	Low
T001660434	-0.408703	Low
T001662758	-0.0652588	Moderate
T001670152	-0.0908492	Moderate
T001665277	-0.356856	Moderate
T001717779	-0.596562	Low
T001726523	-0.106171	Moderate
T001591703	-0.531178	Low
T001781257	-0.408703	Low
T001773956	-0.724772	Low
T001744051	0.553341	High
T001771752	-0.164396	Moderate
T001748790	-0.724772	Low
T001704119	-0.0908492	Moderate
T001707439	-0.912631	Low
T001711432	0.277066	Moderate
T001750413	0.871195	High
T001729091	-0.912631	Low
T001715046	-0.433174	Low
T001755328	-0.58124	Low
T001664463	0.151673	Moderate
T001590525	-0.278708	Moderate
T001660330	-0.459606	Low
T001621552	-0.0908492	Moderate
T001685356	-0.433174	Low
T001730455	-0.724772	Low
T001803001	-0.899093	Low
T001802678	-0.408703	Low
T001805962	-0.0407874	Moderate
T001866059	-0.42224	Low
T001429638	-0.408703	Low
T001738378	-0.724772	Low
9571366	-0.408703	Low
T001540694	0.62884	High
T001642717	0.798804	High
T001663256	0.138449	Moderate
T001811829	-0.58124	Low
T001827958	-0.457821	Low
T001866127	0.996755	High
T001877306	-0.106171	Moderate
T001913765	-1.21516	Low
T001905867	-0.0908492	Moderate
T001905350	-0.724772	Low
T001909554	-0.408703	Low
T001919202	-0.408703	Low
T001973596	0.507206	High
T001980284	-0.847247	Low
T001790933	0.561869	High
T002000330	-0.117105	Moderate
T002010873	0.507206	High
T001995582	0.0168158	Moderate
T001998236	-0.408703	Low
T001985587	0.871195	High
T001999173	-1.21516	Low
T001583990	1.24922	High
T001781129	0.507206	High
T001787080	-0.213324	Moderate
T001791103	0.519589	High
T001823181	-1.21516	Low
T001839014	0.507206	High
T001904143	0.211682	Moderate
T001908193	0.946693	High
T001906561	-0.301038	Moderate
T001889831	0.00631295	Moderate
T001947008	-1.48987	Low
T001920969	-1.3674	Low
T002014434	-1.21516	Low
T002024788	-0.0908492	Moderate
T001559153	0.946693	High
T001720253	-0.356856	Moderate
T001759256	1.73803	High
T001773038	-0.0344014	Moderate
T001787885	0.698825	High
T001787283	0.211682	Moderate
T001807262	-0.58124	Low
T001782369	0.62884	High
T001846185	0.0307844	Moderate
T001906432	0.469527	High
T001896378	0.322382	Moderate
T001928042	-0.0908492	Moderate
T001939824	0.946693	High
T001926497	1.31461	High
T002004023	-0.724772	Low
T002015587	0.185426	Moderate
T001995551	-0.58124	Low
T002006508	-0.338717	Moderate
T002001131	0.875122	High
T002023246	-2.18918	Low
T002038356	-0.0908492	Moderate
T001602504	0.946693	High
T001760033	0.348638	Moderate
T001837535	0.348638	Moderate
T001819279	-0.0908492	Moderate
T001843470	-0.724772	Low
T001852469	-0.724772	Low
T001875503	0.211682	Moderate
T001856254	-1.21516	Low
T001854510	0.456303	High
T001884137	-0.847247	Low
T001891157	-1.56342	Low
T001909664	0.322382	Moderate
T001891523	0.312771	Moderate
T001923376	0.946693	High
T001974934	-0.912631	Low
T001954638	0.456303	High
T002012417	-0.0908492	Moderate
T002023332	-1.21516	Low
T002025685	-1.21516	Low
T002046211	-0.724772	Low
T002035667	0.211682	Moderate
T002021433	-0.923565	Low
T002023788	0.507206	High
T002026312	-0.999483	Low
T001760894	0.211682	Moderate
T001781890	0.189353	Moderate
T001845361	-0.408703	Low
T001890033	-0.42224	Low
T001899960	-0.0908492	Moderate
T001929246	0.946693	High
T001981979	-0.724772	Low
T001981543	0.871195	High
T002014408	-0.126716	Moderate
T001985140	-0.724772	Low
T001985499	-1.21516	Low
T002041441	-0.406918	Moderate
T002019064	-1.21516	Low
T001591403	0.261744	Moderate
T001635584	-0.408703	Low
T001776877	-0.0908492	Moderate
T001786696	0.138449	Moderate
T001833446	1.68713	High
T001835300	1.01668	High
T001861949	1.00136	High
T001876048	2.17752	High
T001913221	-1.21516	Low
T001925432	-0.0908492	Moderate
T001930802	-1.21516	Low
T001924788	-0.899093	Low
T001970370	-0.304965	Moderate
T001960003	-0.531178	Low
T001974604	0.507206	High
T001997066	-0.0908492	Moderate
T002011315	-0.0908492	Moderate
T002026226	0.507206	High
T001861958	0.138449	Moderate
T001865050	-0.408703	Low
T001895259	-0.408703	Low
T001932140	-0.249191	Moderate
T001924607	0.348638	Moderate
T001928515	0.503279	High
T001971890	-0.0908492	Moderate
T001971272	-1.21516	Low
T001968419	0.277066	Moderate
T001986338	-1.21516	Low
T002001187	-0.117105	Moderate
T002019498	-0.912631	Low
T002043691	0.277066	Moderate
T002047727	-1.21516	Low
T002017163	0.946693	High
9591300	-2.18918	Low
T001471315	1.24922	High
T001480267	1.31461	High
T001860689	0.946693	High
T001918385	-0.724772	Low
T001949387	-0.0208637	Moderate
T001980215	-1.21516	Low
T001957550	-1.21516	Low
T001986751	-1.93134	Low
T002010513	0.610944	High
T001990229	-0.0908492	Moderate
T002031943	-0.847247	Low
T002022707	-0.0908492	Moderate
T002068837	1.12675	High
T002125033	1.17765	High
T002065135	-0.408703	Low
T002239546	0.507206	High
T001823144	0.0168158	Moderate
T002080236	-1.21516	Low
T002047632	-0.304965	Moderate
T002135788	-0.408703	Low
T001989407	-0.0908492	Moderate
T002023395	0.507206	High
T002187268	-0.0908492	Moderate
T002199574	-0.0908492	Moderate
T002079126	-2.49171	Low
T002163986	-1.21516	Low
T002179646	-0.899093	Low
T002047587	0.140234	Moderate
T001813233	-0.141753	Moderate
T001991370	1.31461	High
T001803742	-0.58124	Low
T002074277	-0.278708	Moderate
T002170445	0.348638	Moderate
T002230078	-0.0908492	Moderate
T002070415	-0.899093	Low
T002189391	-0.213324	Moderate
T002010967	-1.21516	Low
T002206267	0.211682	Moderate
T001914563	1.16672	High
T001961087	0.469527	High
T002246347	-0.164396	Moderate
T002160905	-2.17564	Low
T001830814	-0.036186	Moderate
T001517654	-0.775675	Low
T001451022	-0.0908492	Moderate
T002059472	-0.899093	Low
T002061702	0.507206	High
T002174058	0.0826309	Moderate
T001952333	-0.325509	Moderate
T001993851	0.579597	High
T002057734	-0.466812	Low
T001913232	-0.769343	Low
T001762368	-0.352255	Moderate
T002057324	-0.58124	Low
T001252091	0.62884	High
T001790841	-2.49171	Low
T001898744	-0.301038	Moderate
T002154046	0.568664	High
T001191766	-0.0908492	Moderate
T001981482	-0.544716	Low
T002029390	-0.58124	Low
T001444143	-0.899093	Low
T002117785	-0.923565	Low
T002127324	-0.617107	Low
T002142681	-0.406918	Moderate
T002242928	-0.899093	Low
T001634568	1.24922	High
T002076268	-0.847247	Low
T001994274	-1.68525	Low
T002221793	-0.117105	Moderate
T002145589	0.277066	Moderate
T002206454	-1.21516	Low
T002269354	-0.106171	Moderate
T002152435	0.716553	High
T002240515	-1.21516	Low
T002078981	0.0128889	Moderate
T001995050	0.946693	High
T002138183	0.348638	Moderate
T002205017	-0.106171	Moderate
T002236408	-1.21516	Low
T002113210	-0.408703	Low
T002085994	0.579597	High
T002150182	-0.724772	Low
T001958292	1.01908	High
T002159736	-0.213324	Moderate
T002135894	-0.724772	Low
T002170609	-0.0908492	Moderate
T002170008	-2.18918	Low
T002156941	-2.49171	Low
T002064679	0.190296	Moderate
T002149338	-0.0908492	Moderate
T002151096	-0.0908492	Moderate
T002220733	-0.42224	Low
T002071190	-0.036186	Moderate
T002258933	-0.0908492	Moderate
T002210451	-0.724772	Low
T002145977	0.348638	Moderate
T002237283	0.211682	Moderate
T002182669	-0.775675	Low
T002196256	-0.724772	Low
T001999456	-2.00132	Low
T001562894	-0.0908492	Moderate
T002090469	-1.68525	Low
T002087974	0.211682	Moderate
T002269758	-0.58124	Low
T002183225	0.20352	Moderate
T002233772	-0.912631	Low
T002133991	0.745802	High
T001916324	-0.531178	Low
T002232184	-0.724772	Low
T002226230	0.211682	Moderate
T002091246	0.716553	High
T002166428	-1.21516	Low
T002041888	0.809738	High
T002220350	-1.21516	Low
T002088891	0.277066	Moderate
T002171161	-0.724772	Low
T002231302	-0.654786	Low
T002185338	-0.544716	Low
T002195617	-0.408703	Low
T002122865	-0.117105	Moderate
T002171797	-0.899093	Low
T001939124	-1.21516	Low
T001898160	0.277066	Moderate
T002161577	-0.724772	Low
T002186666	-1.21516	Low
T002215971	-0.117105	Moderate
T002170959	0.772058	High
T002088288	0.798804	High
T002059964	-0.356856	Moderate
T002067622	0.261744	Moderate
T002252373	-0.724772	Low
T002183526	-0.0908492	Moderate
T002147568	-0.0908492	Moderate
T002014353	-0.912631	Low
T002199532	-0.724772	Low
T002111389	-0.286871	Moderate
T002141260	-0.0908492	Moderate
T002081705	0.25081	Moderate
T002002463	-0.596562	Low
T002079352	-0.724772	Low
T002244260	0.200748	Moderate
T001931144	-1.38272	Low
T002222004	-0.106171	Moderate
T002276874	0.331729	Moderate
T002278543	-0.338717	Moderate
T002085400	-0.406918	Moderate
T002232942	0.519589	High
T002245587	-1.21516	Low

## Sheet: survival probability in risk gr
Time	Risk_Group	No.death	Survival_Probability	Lower_CI	Upper_CI
12	Low	21	0.836335	0.774348	0.903285
24	Low	20	0.649962	0.567676	0.744177
36	Low	13	0.458322	0.361051	0.5818
12	Moderate	40	0.692356	0.616712	0.777278
24	Moderate	35	0.381209	0.302033	0.481142
36	Moderate	13	0.214114	0.14316	0.320236
12	High	88	0.375244	0.302926	0.464826
24	High	36	0.0975233	0.0577451	0.164703
36	High	7	0.0186242	0.0034063	0.10183
